# Supplementary material for: Rostral and caudal basolateral amygdala engage distinct circuits in the prelimbic and infralimbic prefrontal cortex
Source: eLife. 2022 Dec 7;11:e82688. doi: 10.7554/eLife.82688 (PMC9803354; doi:10.7554/eLife.82688)
Supplement: Source data 1. [file elife-82688-data1.xlsx]

## Sheet: Figure 2 Statistics
		Figure 2C								Figure 2-S1C rBLA onto PL L2 CA vs PL L2 CC vs IL L5 CA EPSC amplitude
			Dunn's multiple comparisons test	Mean rank diff.	Significant?	Summary	Adjusted P Value				Dunn's multiple comparisons test	Mean rank diff.	Significant?	Summary	Adjusted P Value
			PL CA vs. IL CA	19.38	Yes	***	0.0003				PL L2 CA vs. PL L2 CC	11	Yes	**	0.0099
			PL CA vs. PL PT	20.38	Yes	***	0.0001				PL L2 CA vs. IL L5 CA	10	Yes	*	0.0226
			PL CA vs. IL PT	15.75	Yes	**	0.0056				PL L2 CC vs. IL L5 CA	-1	No	ns	>0.9999
			IL CA vs. PL PT	1	No	ns	>0.9999
			IL CA vs. IL PT	-3.625	No	ns	>0.9999
			PL PT vs. IL PT	-4.625	No	ns	>0.9999
		Figure 2D								Figure 2-S1F cBLA onto IL L5 PT vs IL L5 CA EPSC amplitude
			Dunn's multiple comparisons test	Mean rank diff.	Significant?	Summary	Adjusted P Value				Wilcoxon matched-pairs signed rank test
			PL CA vs. IL CA	-1.286	No	ns	>0.9999				P value	0.0156
			PL CA vs. PL PT	6.429	No	ns	>0.9999				Exact or approximate P value?	Exact
			PL CA vs. IL PT	-15.57	Yes	**	0.0053				P value summary	*
			IL CA vs. PL PT	7.714	No	ns	0.8123				Significantly different (P < 0.05)?	Yes
			IL CA vs. IL PT	-14.29	Yes	*	0.0136				One- or two-tailed P value?	Two-tailed
			PL PT vs. IL PT	-22	Yes	****	<0.0001				Sum of positive, negative ranks	0.000 , -28.00
											Sum of signed ranks (W)	-28
											Number of pairs	7
											Number of ties (ignored)	0

## Sheet: Figure 3 Statistics
		Figure 3B rBLA EPSC					Figure 3D cBLA EPSC					Figure 3-S1B rBLA-evoked EPSC ratio								Figure 3-S1D cBLA-evoked EPSC ratio
			Wilcoxon matched-pairs signed rank test					Wilcoxon matched-pairs signed rank test					Dunn's multiple comparisons test	Mean rank diff.	Significant?	Summary	Adjusted P Value				Dunn's multiple comparisons test	Mean rank diff.	Significant?	Summary	Adjusted P Value
			P value	0.0078				P value	0.0156				PL CA vs. IL CA	26.88	Yes	****	<0.0001				PL CA vs. IL CA	-1.5	No	ns	>0.9999
			Exact or approximate P value?	Exact				Exact or approximate P value?	Exact				PL CA vs. PL PT	20.25	Yes	***	0.0002				PL CA vs. PL PT	6.375	No	ns	>0.9999
			P value summary	**				P value summary	*				PL CA vs. IL PT	19.13	Yes	**	0.0037				PL CA vs. IL PT	-16.5	Yes	**	0.0027
			Significantly different (P < 0.05)?	Yes				Significantly different (P < 0.05)?	Yes				IL CA vs. PL PT	-6.625	No	ns	>0.9999				IL CA vs. PL PT	7.875	No	ns	0.9603
			One- or two-tailed P value?	Two-tailed				One- or two-tailed P value?	Two-tailed				IL CA vs. IL PT	-7.75	No	ns	>0.9999				IL CA vs. IL PT	-15	Yes	*	0.0152
			Sum of positive, negative ranks	0.000 , -36.00				Sum of positive, negative ranks	28.00 , 0.000				PL PT vs. IL PT	-1.125	No	ns	>0.9999				PL PT vs. IL PT	-22.88	Yes	****	<0.0001
			Sum of signed ranks (W)	-36				Sum of signed ranks (W)	28
			Number of pairs	8				Number of pairs	7
			Number of ties (ignored)	0				Number of ties (ignored)	0			Figure 3-S1B rBLA-evoked IPSC ratio								Figure 3-S1D cBLA-evoked IPSC ratio
													Dunn's multiple comparisons test	Mean rank diff.	Significant?	Summary	Adjusted P Value				Dunn's multiple comparisons test	Mean rank diff.	Significant?	Summary	Adjusted P Value
													PL CA vs. IL CA	22.14	Yes	***	0.0004				PL CA vs. IL CA	3.286	No	ns	>0.9999
		Figure 3B rBLA IPSC					Figure 3D cBLA IPSC						PL CA vs. PL PT	0.3333	No	ns	>0.9999				PL CA vs. PL PT	-4.339	No	ns	>0.9999
			Wilcoxon matched-pairs signed rank test					Wilcoxon matched-pairs signed rank test					PL CA vs. IL PT	3	No	ns	>0.9999				PL CA vs. IL PT	-19.21	Yes	***	0.0003
			P value	0.8125				P value	0.0156				IL CA vs. PL PT	-21.81	Yes	**	0.0017				IL CA vs. PL PT	-7.625	No	ns	>0.9999
			Exact or approximate P value?	Exact				Exact or approximate P value?	Exact				IL CA vs. IL PT	-19.14	Yes	*	0.0275				IL CA vs. IL PT	-22.5	Yes	****	<0.0001
			P value summary	ns				P value summary	*				PL PT vs. IL PT	2.667	No	ns	>0.9999				PL PT vs. IL PT	-14.88	Yes	**	0.0056
			Significantly different (P < 0.05)?	No				Significantly different (P < 0.05)?	Yes
			One- or two-tailed P value?	Two-tailed				One- or two-tailed P value?	Two-tailed
			Sum of positive, negative ranks	16.00 , -12.00				Sum of positive, negative ranks	28.00 , 0.000
			Sum of signed ranks (W)	4				Sum of signed ranks (W)	28
			Number of pairs	7				Number of pairs	7
			Number of ties (ignored)	0				Number of ties (ignored)	0
		Figure 3B rBLA EPSC/IPSC ratio
			Wilcoxon matched-pairs signed rank test
			P value	0.0156
			Exact or approximate P value?	Exact
			P value summary	*
			Significantly different (P < 0.05)?	Yes
			One- or two-tailed P value?	Two-tailed
			Sum of positive, negative ranks	0.000 , -28.00
			Sum of signed ranks (W)	-28
			Number of pairs	7
			Number of ties (ignored)	0
		Figure 3E rBLA PL CA vs IL PT Firing Analysis
			Wilcoxon matched-pairs signed rank test
			P value	0.0313
			Exact or approximate P value?	Exact
			P value summary	*
			Significantly different (P < 0.05)?	Yes
			One- or two-tailed P value?	Two-tailed
			Sum of positive, negative ranks	1.000 , -27.00
			Sum of signed ranks (W)	-26
			Number of pairs	8
			Number of ties (ignored)	1
		Figure 3F cBLA PL CA vs IL PT Firing Analysis
			Wilcoxon matched-pairs signed rank test
			P value	0.0156
			Exact or approximate P value?	Exact
			P value summary	*
			Significantly different (P < 0.05)?	Yes
			One- or two-tailed P value?	Two-tailed
			Sum of positive, negative ranks	28.00 , 0.000
			Sum of signed ranks (W)	28
			Number of pairs	7
			Number of ties (ignored)	0

## Sheet: Figure 4 Statistics
		Figure 4							Figure 4-S2C Spike Latency Comparison
			Chi-squared test with Holm-Bonferroni Method	Significant?	Adjusted P Value	Chi Value			Dunn's multiple comparisons test	Mean rank diff.	Significant?	Summary	Adjusted P Value
		rBLA Excited Units							cBLA to IL L2 vs. cBLA to PL L2	27.75	No	ns	>0.9999
			IL L2 vs. PL L2	Yes	0.00270155	12.3112			cBLA to IL L2 vs. cBLA to IL L5	8.202	No	ns	>0.9999
			PL L2 vs. PL L5	Yes	0.00254591	12.0817			cBLA to IL L2 vs. cBLA to PL L5	-18.5	No	ns	>0.9999
			PL L2 vs. IL L5	Yes	0.0449596	6.42699			cBLA to IL L2 vs. rBLA to IL L2	36.08	No	ns	>0.9999
			IL L2 vs. IL L5	No	0.295908	2.72746			cBLA to IL L2 vs. rBLA to PL L2	-6.714	No	ns	>0.9999
			IL L5 vs. PL L5	No	0.594848	1.08571			cBLA to IL L2 vs. rBLA to IL L5	24.83	No	ns	>0.9999
			IL L2 vs. PL L5	No	0.380553	0.768915			cBLA to IL L2 vs. rBLA to PL L5	8.923	No	ns	>0.9999
		rBLA Inhibited Units							cBLA to PL L2 vs. cBLA to IL L5	-19.55	No	ns	>0.9999
			PL L2 vs. IL L5	Yes	0.000274059	16.6196			cBLA to PL L2 vs. cBLA to PL L5	-46.25	No	ns	>0.9999
			PL L2 vs. PL L5	Yes	0.000985074	13.8593			cBLA to PL L2 vs. rBLA to IL L2	8.333	No	ns	>0.9999
			IL L2 vs. IL L5	Yes	0.00453549	10.5951			cBLA to PL L2 vs. rBLA to PL L2	-34.46	No	ns	>0.9999
			IL L2 vs. PL L5	Yes	0.0130082	8.13742			cBLA to PL L2 vs. rBLA to IL L5	-2.922	No	ns	>0.9999
			IL L2 vs. PL L2	No	0.464489	1.42706			cBLA to PL L2 vs. rBLA to PL L5	-18.83	No	ns	>0.9999
			IL L5 vs. PL L5	No	0.536929	0.381261			cBLA to IL L5 vs. cBLA to PL L5	-26.7	No	ns	>0.9999
		cBLA Excited Units							cBLA to IL L5 vs. rBLA to IL L2	27.88	No	ns	>0.9999
			IL L5 vs. PL L5	Yes	3.64923e-05	20.4622			cBLA to IL L5 vs. rBLA to PL L2	-14.92	No	ns	>0.9999
			PL L2 vs. IL L5	Yes	0.00135382	13.2625			cBLA to IL L5 vs. rBLA to IL L5	16.63	No	ns	>0.9999
			IL L2 vs. IL L5	Yes	0.0208666	7.80276			cBLA to IL L5 vs. rBLA to PL L5	0.7207	No	ns	>0.9999
			IL L2 vs. PL L2	No	0.560159	1.74331			cBLA to PL L5 vs. rBLA to IL L2	54.58	No	ns	0.2722
			PL L2 vs. PL L5	No	0.521341	1.26519			cBLA to PL L5 vs. rBLA to PL L2	11.79	No	ns	>0.9999
			IL L2 vs. PL L5	No	0.696619	0.152013			cBLA to PL L5 vs. rBLA to IL L5	43.33	No	ns	0.3258
		cBLA Inhibited Units							cBLA to PL L5 vs. rBLA to PL L5	27.42	No	ns	>0.9999
			PL L2 vs. IL L5	No	0.143484	5.10086			rBLA to IL L2 vs. rBLA to PL L2	-42.8	No	ns	0.2841
			PL L2 vs. PL L5	No	0.120304	5.09024			rBLA to IL L2 vs. rBLA to IL L5	-11.26	No	ns	>0.9999
			IL L2 vs. IL L5	No	0.231651	3.59617			rBLA to IL L2 vs. rBLA to PL L5	-27.16	No	ns	>0.9999
			IL L2 vs. PL L5	No	0.176036	3.57434			rBLA to PL L2 vs. rBLA to IL L5	31.54	No	ns	0.1406
			IL L2 vs. PL L2	No	1.16515	0.302093			rBLA to PL L2 vs. rBLA to PL L5	15.64	No	ns	>0.9999
			IL L5 vs. PL L5	No	0.985319	0.000338581			rBLA to IL L5 vs. rBLA to PL L5	-15.91	No	ns	>0.9999
		rBLA Responsive Units
			IL L2 vs. IL L5	Yes	0.00117144	13.8764
			IL L2 vs. PL L5	Yes	0.0207783	8.21452
			IL L2 vs. PL L2	Yes	0.0392104	6.67042
			IL L5 vs. PL L5	No	0.671161	1.48035
			PL L2 vs. IL L5	No	0.713099	0.850011
			PL L2 vs. PL L5	No	0.973355	0.00111561
		cBLA Responsive Units
			PL L2 vs. IL L5	Yes	3.83499e-05	20.3672
			IL L2 vs. IL L5	Yes	0.00174275	12.7896
			IL L5 vs. PL L5	Yes	0.00147548	12.6836
			PL L2 vs. PL L5	Yes	0.0320446	6.51754
			IL L2 vs. PL L2	No	0.325152	1.9501
			IL L2 vs. PL L5	No	0.199852	1.64345

## Sheet: Figure 5 Statistics
		Figure 5A-C sub. Vs superthreshold EPSC					Figure 5A-C sub. Vs superthreshold IPSC					Figure 5-S1C cBLA-evoked firing from IL L5 PT, IL L5 CA, and IL L2 CA
			Wilcoxon matched-pairs signed rank test					Wilcoxon matched-pairs signed rank test					Dunn's multiple comparisons test	Rank sum diff.	Significant?	Summary	Adjusted P Value
			P value	0.0156				P value	0.0078				IL L5 PT vs. IL L5 CA	10.5	Yes	*	0.015
			Exact or approximate P value?	Exact				Exact or approximate P value?	Exact				IL L5 PT vs. IL L2 CA	10.5	Yes	*	0.015
			P value summary	*				P value summary	**				IL L5 CA vs. IL L2 CA	0	No	ns	>0.9999
			Significantly different (P < 0.05)?	Yes				Significantly different (P < 0.05)?	Yes
			One- or two-tailed P value?	Two-tailed				One- or two-tailed P value?	Two-tailed
			Sum of positive, negative ranks	35.00 , -1.000				Sum of positive, negative ranks	36.00 , 0.000
			Sum of signed ranks (W)	34				Sum of signed ranks (W)	36
			Number of pairs	8				Number of pairs	8
			Number of ties (ignored)	0				Number of ties (ignored)	0
		Figure 5D-F sub. Vs superthreshold EPSC					Figure 5D-F sub. Vs superthreshold IPSC
			Wilcoxon matched-pairs signed rank test					Wilcoxon matched-pairs signed rank test
			P value	0.0547				P value	0.6406
			Exact or approximate P value?	Exact				Exact or approximate P value?	Exact
			P value summary	ns				P value summary	ns
			Significantly different (P < 0.05)?	No				Significantly different (P < 0.05)?	No
			One- or two-tailed P value?	Two-tailed				One- or two-tailed P value?	Two-tailed
			Sum of positive, negative ranks	32.00 , -4.000				Sum of positive, negative ranks	22.00 , -14.00
			Sum of signed ranks (W)	28				Sum of signed ranks (W)	8
			Number of pairs	8				Number of pairs	8
			Number of ties (ignored)	0				Number of ties (ignored)	0
		Figure 5G-I sub. Vs superthreshold EPSC					Figure 5G-I sub. Vs superthreshold IPSC
			Wilcoxon matched-pairs signed rank test					Wilcoxon matched-pairs signed rank test
			P value	0.0547				P value	0.0273
			Exact or approximate P value?	Exact				Exact or approximate P value?	Exact
			P value summary	ns				P value summary	*
			Significantly different (P < 0.05)?	No				Significantly different (P < 0.05)?	Yes
			One- or two-tailed P value?	Two-tailed				One- or two-tailed P value?	Two-tailed
			Sum of positive, negative ranks	39.00 , -6.000				Sum of positive, negative ranks	41.00 , -4.000
			Sum of signed ranks (W)	33				Sum of signed ranks (W)	37
			Number of pairs	9				Number of pairs	9
			Number of ties (ignored)	0				Number of ties (ignored)	0

## Sheet: Figure 6 Statistics
		Figure 6E-F PL L2 CA onto L2, L3, and L5 pyramidal neurons EPSC amplitude								Figure 6-S1C EPSC triplets		Friedman Test
			Dunn's multiple comparisons test	Rank sum diff.	Significant?	Summary	Adjusted P Value				Dunn's multiple comparisons test	Rank sum diff.	Significant?	Summary	Adjusted P Value
			L2 vs. L3	10	Yes	*	0.0373				L2 vs. L3	7	No	ns	0.2404
			L2 vs. L5	-4	No	ns	0.9519				L2 vs. L5	-4	No	ns	0.9519
			L3 vs. L5	-14	Yes	**	0.0014				L3 vs. L5	-11	Yes	*	0.0179
		Figure 6E-F PL L2 CA onto L2, L3, and L5 pyramidal neurons IPSC amplitude								Figure 6-S1C IPSC triplets		Friedman Test
			Dunn's multiple comparisons test	Rank sum diff.	Significant?	Summary	Adjusted P Value				Dunn's multiple comparisons test	Rank sum diff.	Significant?	Summary	Adjusted P Value
			L2 vs. L3	14	Yes	**	0.0014				L2 vs. L3	6	No	ns	0.4008
			L2 vs. L5	7	No	ns	0.2404				L2 vs. L5	-3	No	ns	>0.9999
			L3 vs. L5	-7	No	ns	0.2404				L3 vs. L5	-9	No	ns	0.0733
		Figure 6E-F PL L2 CA onto L2, L3, and L5 pyramidal neurons EPSC/IPSC ratio
			Dunn's multiple comparisons test	Mean rank diff.	Significant?	Summary	Adjusted P Value
			L2 vs. L3	-6.257	No	ns	0.2126
			L2 vs. L5	-9.482	Yes	**	0.0059
			L3 vs. L5	-3.225	No	ns	>0.9999

## Sheet: Figure 7 Statistics
		Figure 7B PL L2 CA onto PL L5 PT vs IT EPSC					Figure 7-S1C PL CA onto L5 IT vs PT EPSC amplitude
			Wilcoxon matched-pairs signed rank test					Wilcoxon matched-pairs signed rank test
			P value	0.0005				P value	0.0039
			Exact or approximate P value?	Exact				Exact or approximate P value?	Exact
			P value summary	***				P value summary	**
			Significantly different (P < 0.05)?	Yes				Significantly different (P < 0.05)?	Yes
			One- or two-tailed P value?	Two-tailed				One- or two-tailed P value?	Two-tailed
			Sum of positive, negative ranks	0.000 , -78.00				Sum of positive, negative ranks	1.000 , -54.00
			Sum of signed ranks (W)	-78				Sum of signed ranks (W)	-53
			Number of pairs	12				Number of pairs	10
			Number of ties (ignored)	0				Number of ties (ignored)	0
		Figure 7B PL L2 CA onto PL L5 PT vs IT IPSC					Figure 7-S1C PL CA onto L5 IT vs PT IPSC amplitude
			Wilcoxon matched-pairs signed rank test					Wilcoxon matched-pairs signed rank test
			P value	0.0273				P value	0.0488
			Exact or approximate P value?	Exact				Exact or approximate P value?	Exact
			P value summary	*				P value summary	*
			Significantly different (P < 0.05)?	Yes				Significantly different (P < 0.05)?	Yes
			One- or two-tailed P value?	Two-tailed				One- or two-tailed P value?	Two-tailed
			Sum of positive, negative ranks	6.000 , -49.00				Sum of positive, negative ranks	8.000 , -47.00
			Sum of signed ranks (W)	-43				Sum of signed ranks (W)	-39
			Number of pairs	10				Number of pairs	10
			Number of ties (ignored)	0				Number of ties (ignored)	0
		Figure 7D PT E vs PT E+I
			Wilcoxon matched-pairs signed rank test
			P value	0.0156
			Exact or approximate P value?	Exact
			P value summary	*
			Significantly different (P < 0.05)?	Yes
			One- or two-tailed P value?	Two-tailed
			Sum of positive, negative ranks	0.000 , -28.00
			Sum of signed ranks (W)	-28
			Number of pairs	7
			Number of ties (ignored)	0
