# Supplementary material for: Rostral and caudal basolateral amygdala engage distinct circuits in the prelimbic and infralimbic prefrontal cortex
Source: eLife. 2022 Dec 7;11:e82688. doi: 10.7554/eLife.82688 (PMC9803354; doi:10.7554/eLife.82688)
Supplement: Source data 2. [file elife-82688-data2.xlsx]

## Sheet: Figure 1
	Figure 1C (raw counts)												Figure 1F (PL fluoresence per animal)									Figure 1F (IL fluoresence per animal)
		IL Projecting			PL Projecting			Dual Projecting						rBLA			cBLA						rBLA			cBLA
	-1	11	5	7	36	30	21	6	6	5			10	7.14067	0.40699	1.49763	6.47139	17.1456	9.17092			10	1.94174	4.74834	12.1628	6.49888	8.44293	8.59596
	-1.1	22	15	14	49	61	56	10	8	20			20	7.32099	0.560906	1.49318	6.5668	19.991	14.4204			20	3.57458	7.69199	12.4443	13.4668	13.0096	12.9975
	-1.2	46	24	49	86	98	83	20	11	48			30	7.06578	1.01368	1.47162	6.45552	19.7847	15.4873			30	3.26488	11.3142	12.3948	18.4808	18.5137	15.3552
	-1.3	75	56	70	83	121	65	30	28	34			40	6.43618	0.937193	1.88037	5.79699	18.1061	15.0761			40	3.70985	12.8695	14.3346	22.0129	20.552	17.2823
	-1.4	89	63	116	103	112	70	29	39	52			50	6.91531	1.79781	3.00977	6.6788	16.6328	15.0251			50	5.97808	17.4952	15.5793	29.232	22.2511	20.3694
	-1.5	103	81	137	94	75	54	55	28	41			60	9.40939	4.37635	5.12369	8.09824	15.6861	14.9834			60	4.95791	21.4502	15.0247	32.1678	22.4002	23.6018
	-1.6	131	90	141	80	78	54	50	33	45			70	13.5283	7.54055	9.36302	10.241	15.4953	15.7261			70	5.20675	22.4751	17.2755	32.4154	21.1397	28.0523
	-1.7	109	95	156	54	40	33	34	26	35			80	16.0192	11.774	14.6616	15.5659	15.9555	16.0125			80	7.53102	24.5259	20.7815	35.2778	20.0395	32.3923
	-1.8	109	129	139	47	38	29	18	13	14			90	25.0115	18.6475	23.9826	22.2696	15.7037	17.279			90	6.00191	29.3002	22.3387	37.0059	19.7629	35.154
													100	32.2724	32.8672	36.5541	28.9822	16.4779	20.6197			100	4.94972	33.5957	26.7156	39.6533	18.9694	43.4153
	Figure 1C (normalized)												110	45.8907	48.1724	50.2499	36.1748	17.5947	24.8669			110	5.30676	38.222	26.9627	39.2495	17.4445	49.9159
		IL Projecting			PL Projecting			Dual Projecting					120	59.5301	64.5488	69.6615	50.0837	20.2899	31.3648			120	5.23852	42.3511	23.743	39.3225	16.8998	48.1274
	-1	20.7547	12.1951	21.2121	67.9245	73.1707	63.6364	11.3208	14.6341	15.1515			130	70.4041	80.4031	82.5844	58.8045	23.9466	37.9051			130	5.69869	37.85	26.0041	38.3669	15.3158	49.2709
	-1.1	27.1605	17.8571	15.5556	60.4938	72.619	62.2222	12.3457	9.5238	22.2222			140	76.7078	90.4634	83.2521	62.998	28.569	45.4589			140	6.4761	36.0476	24.0518	37.133	15.2441	47.1486
	-1.2	30.2632	18.0451	27.2222	56.5789	73.6842	46.1111	13.1579	8.2707	26.6667			150	90.9271	94.933	86.6357	67.7513	31.0954	49.0164			150	4.91889	33.6161	17.6067	38.006	15.8603	40.5176
	-1.3	39.8936	27.3171	41.4201	44.1489	59.0244	38.4615	15.9574	13.6585	20.1183			160	94.7467	88.2083	83.198	68.9152	32.6975	51.9204			160	4.83987	28.0404	15.3349	34.7015	15.0932	37.5604
	-1.4	40.2715	29.4393	48.7395	46.6063	52.3364	29.4118	13.1222	18.2243	21.8487			170	85.2185	74.8787	81.4394	64.8887	32.2086	53.7195			170	4.13662	23.1817	16.2703	31.5072	15.5005	31.2913
	-1.5	40.873	44.0217	59.0517	37.3016	40.7609	23.2759	21.8254	15.2174	17.6724			180	68.5774	67.4879	80.1908	58.8872	26.4633	42.731			180	4.12479	20.1697	17.3103	27.3811	17.1074	26.5764
	-1.6	50.1916	44.7761	58.75	30.6513	38.806	22.5	19.1571	16.4179	18.75			190	61.2488	66.5866	79.0893	54.9245	25.7848	41.9415			190	3.91258	17.2301	15.5951	22.4664	18.1836	23.0557
	-1.7	55.3299	59.0062	69.6429	27.4112	24.8447	14.7321	17.2589	16.1491	15.625			200	67.5747	63.5414	73.0847	51.2382	29.711	40.1014			200	5.0709	15.5389	15.227	22.8848	20.3386	22.4399
	-1.8	62.6437	71.6667	76.3736	27.0115	21.1111	15.9341	10.3448	7.2222	7.6923			210	66.3501	57.017	69.1768	47.7862	32.8952	37.6854			210	3.73879	13.2864	14.2863	20.6119	21.2477	21.9547
													220	66.7891	44.1974	59.3223	45.3178	30.2924	35.1521			220	4.19514	12.8063	14.8347	21.9536	21.029	22.5885
													230	58.8423	29.8878	48.797	42.721	27.9283	35.1468			230	4.39949	12.9967	14.4334	24.1167	23.2469	21.8958
													240	46.5938	22.9256	36.6808	33.2982	26.5417	31.0876			240	4.61506	13.4451	14.1784	24.8803	27.2478	23.9994
													250	33.6309	15.8631	29.7164	27.0426	24.5735	27.3749			250	4.93418	13.3316	13.6396	24.6941	29.6178	23.3784
													260	29.7113	11.6558	23.5303	22.9534	24.4424	23.3604			260	5.19942	14.5803	13.4963	26.4	33.3138	24.6644
													270	25.3664	9.92444	16.8829	21.87	23.3216	21.0949			270	5.06004	15.4486	13.6548	27.5455	32.0397	27.1548
													280	23.3594	8.65401	15.8485	19.0685	23.3874	20.2256			280	5.80342	15.8439	11.2973	29.3569	33.6231	29.2032
													290	21.6461	8.04108	13.9055	16.7278	22.4112	19.4682			290	6.27732	16.8836	13.1074	33.0584	34.9189	33.0782
													300	19.68	7.59391	12.8473	15.7526	23.0843	18.1706			300	5.55122	18.0729	12.8606	34.1847	37.7909	35.9193
													310	18.7267	7.11352	11.9404	14.5976	23.4118	17.5813			310	5.73402	20.5165	12.4572	35.8689	43.9912	39.0324
													320	19.6837	6.99786	10.909	15.3182	23.2298	17.8331			320	6.16804	22.0031	13.6484	39.3486	47.6882	42.9561
													330	18.577	6.625	10.7838	15.5534	23.8912	16.8448			330	6.10215	22.3531	13.7523	45.0529	47.8049	47.249
													340	18.5851	6.54315	10.7478	15.6586	23.3176	16.858			340	6.72791	23.5954	13.5587	47.2287	50.1025	49.5061
													350	18.6601	6.85699	10.2138	16.1007	22.5305	17.2326			350	7.39485	24.9711	13.593	51.0401	51.6375	55.0213
													360	17.664	7.32691	10.9306	15.6157	23.0584	16.3153			360	6.88076	27.1819	15.9282	53.8788	56.0768	56.9858
													370	18.2668	6.82894	8.63873	16.7398	23.3027	17.0164			370	7.52012	30.3507	15.097	56.2204	57.571	59.3131
													380	16.6575	6.77642	9.8057	18.6962	23.4105	16.9452			380	8.39372	31.4796	16.7754	56.8365	57.5958	61.2756
													390	17.7472	7.09918	10.5661	18.954	23.3667	15.9371			390	7.95828	32.3713	18.5127	60.1029	61.3566	65.2342
													400	18.9937	7.48175	9.56452	18.5256	24.6653	16.7116			400	8.03623	35.0018	20.161	62.3542	62.6506	71.1196
													410	20.1102	7.63853	8.17088	19.0345	23.6994	16.6842			410	8.45283	36.3988	20.6829	65.3372	64.4045	74.0683
													420	21.1073	8.21869	9.33526	21.1795	23.4628	16.9769			420	8.28759	40.5371	19.4153	63.8908	71.1559	77.5716
													430	21.2687	8.33243	9.05269	20.3902	23.8896	17.5198			430	8.75192	41.6622	21.9466	70.1096	72.8417	84.8496
													440	21.3071	8.92291	8.73166	22.9832	24.531	17.447			440	9.6827	41.0601	23.5182	74.7887	73.7505	81.9201
													450	21.3683	8.80227	10.1112	22.5319	24.6044	16.8405			450	10.9238	40.2769	26.4501	74.7924	75.142	85.1963
													460	21.9213	9.1409	10.6552	23.794	26.6804	18.0196			460	10.9826	42.0185	29.0226	72.9099	74.6276	87.158
													470	23.3451	9.68406	11.0465	24.0422	25.6959	17.5856			470	12.2889	43.2856	29.5697	75.096	75.6032	89.0968
													480	25.7764	10.5898	11.2343	24.9254	27.4136	18.3549			480	11.0875	43.0966	29.506	73.1716	77.6749	90.3164
													490	27.1016	10.5601	12.6461	27.3291	27.6394	18.1604			490	11.0721	43.1065	33.8765	77.188	78.4103	89.4926
													500	28.9437	12.2464	13.0089	28.6548	27.8674	19.4763			500	11.6976	43.2548	35.1748	77.9985	83.309	88.3243
													510	31.2793	13.434	15.5762	27.6397	27.6608	18.8162			510	13.7212	45.1546	35.6102	79.7022	85.3064	91.0529
													520	34.4458	13.6412	16.2845	28.4846	27.9048	20.0326			520	11.9291	46.0574	34.017	78.9279	86.1393	83.9389
													530	36.5322	14.842	14.9375	28.679	28.6147	20.4272			530	11.4448	46.1404	36.3468	80.5198	89.3811	83.9142
													540	36.2145	15.8742	16.1283	29.943	29.4445	19.1185			540	13.2959	44.7494	38.8271	75.7151	90.6384	82.3874
													550	36.9239	17.8102	17.3768	31.2378	29.3223	20.4617			550	15.3661	43.715	43.4847	76.9455	91.8118	83.3632
													560	35.1289	17.2076	15.7384	32.9535	28.5504	20.8526			560	11.8918	41.623	44.3985	80.2305	92.3778	85.5033
													570	35.572	19.5516	17.8713	33.634	29.1078	20.8803			570	10.8376	39.1902	46.3093	77.4138	86.3461	81.6249
													580	35.7957	20.6854	17.1068	32.8476	29.0438	20.3224			580	10.3203	35.0742	42.008	78.5937	90.1277	83.4297
													590	33.6871	20.4232	18.1376	32.4161	30.2109	20.9965			590	11.2895	33.3832	45.0918	77.7432	85.9759	83.3868
													600	31.2495	20.3663	18.7624	32.0945	29.3698	20.894			600	10.0434	31.1315	41.6061	77.9871	78.2262	79.0058
													610	32.9804	18.9307	21.1361	29.9292	29.2577	22.7511			610	9.47733	29.6227	40.9784	74.4031	66.1654	75.9727
													620	35.011	20.1262	21.7032	28.6021	29.7188	21.6871			620	9.86156	28.5813	42.843	71.9462	58.406	70.8257
													630	35.773	21.199	21.2659	28.969	29.686	22.1764			630	8.84232	24.0157	40.2974	67.4227	55.542	69.1071
													640	36.611	21.8075	19.5833	30.6357	30.2513	24.0646			640	6.87561	21.9056	33.8884	58.7795	43.8714	61.3525
													650	32.4483	19.8937	19.2512	32.1881	29.4129	23.7066			650	6.97659	23.4634	32.8772	49.7808	39.8906	55.9137
													660	31.9094	18.878	19.0948	27.9573	29.8056	22.6226			660	8.11108	23.6666	27.1806	44.1545	39.4475	50.2546
													670	34.5159	19.1808	19.9068	26.9894	29.9089	23.0362			670	9.56194	23.4934	28.7289	39.7845	34.7187	46.6516
													680	27.9961	18.3318	20.1798	30.2098	29.752	22.7874			680	11.0935	23.874	28.5523	35.0455	32.3366	46.1974
													690	28.3514	18.9745	20.6255	30.0945	29.2457	21.5265			690	10.304	21.8705	28.171	33.2839	32.4207	44.8752
													700	26.4773	18.6839	20.8539	29.2801	29.8125	21.9121			700	15.5775	21.7211	27.5248	31.3284	31.2756	41.7141
													710	28.7274	18.524	21.8262	28.9629	29.2066	21.684			710	14.2494	21.0719	26.4865	29.2959	27.9738	40.97
													720	27.3778	18.074	20.4603	25.4903	28.8525	21.4229			720	11.5564	21.0549	27.0009	26.3133	26.5849	38.2899
													730	25.3653	18.5281	23.3028	23.0836	27.3104	22.4197			730	12.2329	21.0552	25.3127	29.6095	27.4982	34.5579
													740	24.1665	16.1861	21.9999	21.5362	27.3597	22.3975			740	10.6133	21.6569	21.1559	27.8553	27.1751	32.9243
													750	26.6204	15.259	20.9256	22.7895	26.0755	22.7629			750	11.2376	22.553	21.6524	25.0354	29.29	32.4719
													760	26.7122	14.5527	20.4472	20.6679	25.2269	23.5985			760	11.8243	23.7097	22.2186	23.518	27.8439	32.8285
													770	22.3743	14.2971	21.0173	20.3491	23.7446	25.7056			770	12.4858	23.0699	21.5719	23.1018	26.8689	29.1118
													780	24.7621	14.5932	22.4766	19.705	24.4556	25.6627			780	14.41	23.6718	20.1572	25.2694	27.7806	28.4463
													790	26.9417	14.6491	23.6061	16.4127	23.5903	26.6345			790	14.1639	23.767	20.8414	26.1721	28.052	27.3293
													800	24.7461	14.2951	25.3964	13.9235	24.0284	26.7958			800	15.6562	25.4253	19.3125	24.3421	29.1445	24.6892
													810	23.2776	16.1613	24.159	13.842	23.9824	25.9475			810	16.8031	24.3117	18.7117	25.5613	27.1172	24.8005
													820	20.8651	16.129	25.285	12.945	22.9327	25.6722			820	18.114	22.3718	16.6738	25.4808	28.7979	23.2501
													830	22.5891	15.8315	23.6901	13.6159	23.7136	25.3943			830	16.4245	22.3524	16.8355	22.3375	27.7787	20.7968
													840	19.6438	15.9849	21.4573	13.3378	23.7245	23.4174			840	16.1347	20.6995	17.1462	21.6092	28.2915	20.5272
													850	20.2079	14.6774	18.8388	12.8071	24.426	23.7614			850	15.3374	19.6314	15.1445	24.6191	29.9762	19.5571
													860	17.4265	14.9492	20.4295	11.6569	23.2493	21.9189			860	15.5332	21.8682	13.4925	24.4392	29.0554	17.6303
													870	15.7561	14.2539	20.4285	11.4199	24.2099	20.5382			870	15.7903	21.9692	12.2317	20.8174	27.1799	16.8693
													880	14.8849	14.7896	19.207	11.4014	24.488	20.0134			880	14.5734	21.7778	10.3415	18.9575	27.3626	16.2702
													890	15.0703	14.9691	16.2604	10.2979	24.2798	18.6899			890	15.0923	19.7387	12.1204	20.8499	28.0405	15.2948
													900	15.6664	15.0755	16.4986	9.74201	24.5763	16.6585			900	14.6897	21.4162	12.4625	20.3093	26.2469	14.2241
													910	15.2374	14.8569	14.2879	8.47504	24.5015	17.0476			910	16.1115	20.6963	13.7376	18.5713	25.5371	12.8259
													920	14.0374	14.8596	12.7647	9.41784	23.8538	16.9101			920	15.4997	20.3202	12.255	20.3418	23.4096	13.108
													930	14.9157	14.3677	13.8719	10.0079	25.1715	15.8757			930	16.4673	19.8279	12.0047	16.6843	24.8272	11.3259
													940	13.6678	15.43	13.9316	10.0506	23.4459	14.0197			940	16.4055	19.6244	11.9534	14.7424	25.1819	9.82709
													950	13.2462	13.6874	12.9819	9.8227	23.1837	13.6886			950	11.9681	20.3155	8.88201	12.7588	22.3935	9.11795
													960	11.6186	14.6703	13.0168	8.98643	22.4205	13.3433			960	12.128	18.0054	8.29661	12.0496	23.6629	8.89775
													970	12.1589	13.308	12.9624	8.97129	22.5193	13.1669			970	10.0277	16.95	9.46618	11.4681	22.1679	6.81121
													980	13.1688	12.4864	13.901	9.34858	22.5356	13.1334			980	11.5699	17.4373	9.70777	10.4983	20.1159	7.45226
													990	11.2022	13.3403	12.2269	9.01979	22.6179	16.5899			990	11.5999	15.6718	9.88349	9.9648	18.9384	11.0865
													1000	10.7747	12.993	9.97477	8.41496	21.8123	21.1219			1000	12.119	13.7766	9.5314	8.26234	18.5775	13.4177

## Sheet: Figure 1-S1
	Figure 1-S1G (raw counts)
		IL Projecting				PL Projecting
	-1	1	6	8	27	23	39	29	82
	-1.1	5	3	22	66	59	68	43	128
	-1.2	27	23	51	102	101	84	69	143
	-1.3	39	31	71	123	141	95	89	211
	-1.4	70	68	122	190	113	85	152	241
	-1.5	77	101	154	219	88	75	141	174
	-1.6	82	135	210	236	62	51	86	138
	-1.7	111	138	215	232	78	30	89	127
	-1.8	121	133	221	249	49	9	51	99
	Figure 1-S1G (normalized counts)
		PL Projecting				IL Projecting
	-1	0.008264	0.043478	0.036199	0.108434	0.163121	0.410526	0.190789	0.340249
	-1.1	0.041322	0.021739	0.099548	0.26506	0.41844	0.715789	0.282895	0.53112
	-1.2	0.22314	0.166667	0.230769	0.409639	0.716312	0.884211	0.453947	0.593361
	-1.3	0.322314	0.224638	0.321267	0.493976	1	1	0.585526	0.875519
	-1.4	0.578512	0.492754	0.552036	0.763052	0.801418	0.894737	1	1
	-1.5	0.636364	0.731884	0.696833	0.879518	0.624113	0.789474	0.927632	0.721992
	-1.6	0.677686	0.978261	0.950226	0.947791	0.439716	0.536842	0.565789	0.572614
	-1.7	0.917355	1	0.972851	0.931727	0.553191	0.315789	0.585526	0.526971
	-1.8	1	0.963768	1	1	0.347518	0.094737	0.335526	0.410788

## Sheet: Figure 1-S2
	Figure 1-S2E (rBLA Fluorescence per slice)																								Figure 1-S2J (cBLA Fluorescence per slice)																								Figure 1-S2C
			PL											IL													PL											IL
		10	0.46337	2.87623	4.70237	0	0	14.3646	1.29816	2.0689	0			3.33298	0	0	15.425	10.2322	0	0	0	0.528011				10	5.46807	2.20178	12.5343	2.91883	0.681236	6.80789	22.441	2.3036	5.99614			0	0	5.22306	29.0289	14.0419	19.7212	2.30476	6.84028	16.4948			0
		20	1.88438	3.09234	5.82706	1.89711	0.0792429	12.5088	1.97455	2.25224	1.51181			4.58779	3.08425	1.40328	16.7122	12.7596	9.19811	1.98189	0.905341	2.94881				20	10.474	0.758454	11.7056	2.88509	11.5282	11.5291	22.9244	4.34733	5.28621			4.07272	4.75362	8.6145	28.8813	17.1994	20.0404	1.23078	15.3509	17.1655			0.568
		30	2.74427	3.74308	6.65893	3.77168	1.28122	8.89328	2.57466	3.19696	2.06698			0.540825	6.0265	4.19383	18.4575	18.4063	12.6234	3.57911	4.20737	4.50446				30	13.2911	2.97198	13.2354	3.92152	14.4564	13.2413	21.2741	4.5806	4.4985			9.08861	9.391	11.3314	25.3304	16.0341	20.9293	0.323749	16.9195	15.0196			1.135
		40	2.02963	4.69369	7.39094	7.17311	4.68375	8.96705	3.75392	4.4318	2.64859			0	6.99579	6.98057	18.6508	25.7452	13.9407	1.76247	5.90465	3.00607				40	15.0351	8.5834	13.4538	8.5272	15.5285	13.9033	17.8043	5.12974	3.50132			13.7007	12.0287	12.7504	23.6566	14.3213	23.3476	1.14311	18.4465	13.3574			1.703
		50	2.34398	5.37205	7.47519	9.77254	10.1653	10.8894	5.80505	9.45524	3.39885			0.143551	6.24243	6.33078	19.2947	30.4565	15.7793	1.56606	2.12202	3.07598				50	19.0038	10.0742	16.3333	19.2862	16.686	17.7372	14.3465	4.65653	4.49143			22.1194	21.3878	16.3287	24.2229	13.105	24.7396	2.73793	19.1817	14.8092			2.271
		60	3.5818	6.24641	7.58185	13.0255	16.1806	11.779	7.49854	14.8153	3.99186			0.91664	4.5845	5.97529	20.2193	30.7677	19.6468	1.41491	3.37447	2.78068				60	22.6398	10.4672	19.686	22.2748	25.293	19.7786	12.2276	7.6973	10.0029			25.0243	22.6488	18.5336	22.1041	12.0307	24.2349	4.20408	18.7178	14.8923			2.839
		70	6.15284	6.50687	9.72155	17.6003	21.704	14.6689	14.8678	23.567	8.87391			1.60793	4.72806	6.47799	24.0738	32.2744	19.6611	1.55074	0.823771	3.20653				70	26.7609	10.9042	21.789	24.9756	31.7653	20.6733	12.0009	10.4199	15.8479			28.1183	26.3494	23.0252	20.8617	12.2818	25.7939	7.34814	19.885	13.5938			3.406
		80	10.0358	6.9041	13.4965	21.5934	26.905	15.8118	20.2833	34.1119	14.3852			2.79151	5.24614	6.12069	27.7066	35.5617	25.4124	1.58594	0.485542	2.59693				80	32.7569	11.5102	27.5425	31.5036	44.052	24.9575	15.5703	14.4348	23.5017			33.5418	29.7678	26.8954	19.144	11.1187	33.02	8.22555	19.3214	11.9801			3.974
		90	18.1284	8.01824	19.8036	26.7497	30.183	15.3951	37.8232	50.0799	22.6992			1.48338	5.29404	6.74053	33.4042	35.2271	21.5614	1.29875	1.00196	3.2286				90	43.4698	13.8054	32.1287	48.5781	49.0121	37.2663	25.0952	31.5343	40.2267			40.2571	34.3318	35.8495	16.4862	10.7914	44.9933	13.6358	20.1434	16.6037			4.542
		100	28.2474	9.53347	26.1538	40.764	31.2236	18.0727	47.8373	71.0349	34.0732			1.11663	6.91322	8.61495	37.3469	38.2339	19.383	2.25712	0.984405	2.97126				100	47.7498	19.9744	36.8405	47.2368	55.6088	49.8049	33.4075	38.9724	57.8507			45.6752	40.1642	37.3236	16.8662	9.08164	37.5374	24.3419	21.4303	22.7421			5.109
		110	43.8349	15.6225	38.2433	57.7596	30.9505	25.3976	75.7604	88.409	51.9824			1.71813	6.13351	7.19576	41.4454	49.0636	19.898	2.39838	0.772768	2.08875				110	60.5563	26.0419	45.098	49.5201	46.5938	61.8067	49.0655	41.0365	74.0495			48.1036	47.2053	42.3454	18.3938	9.58879	30.7856	39.3019	28.7175	40.8549			5.677
		120	58.7898	20.1329	51.178	69.7332	33.9902	25.1949	89.8895	92.657	69.6969			2.36853	5.17031	6.54389	39.9359	54.8337	28.8445	2.84852	0.712442	2.06087				120	61.6459	35.4762	42.3794	58.2499	37.9654	66.2016	68.305	41.2468	80.6179			57.2634	65.1289	47.6912	19.6781	7.671	26.3103	43.7518	34.1925	49.5033			6.245
		130	73.0809	30.9655	67.9753	76.5109	41.6534	34.9049	100	100	90.0907			2.52509	4.7219	6.49333	40.9064	53.1951	35.7259	2.64903	0.145846	1.98341				130	68.0796	46.0708	31.3658	40.3083	37.0644	62.6557	88.7674	40.9845	76.2399			74.96	75.2569	54.472	23.0831	7.70435	26.2272	54.7996	44.3212	65.1095			6.812
		140	89.6891	45.9244	81.3979	75.8171	56.4569	46.4887	98.7101	97.2547	96.5997			4.16523	4.71293	7.06575	35.6678	50.3454	33.3015	2.77784	0.0272734	1.80417				140	73.8228	53.0163	42.0053	35.4027	39.6485	50.6119	97.6037	36.3561	64.9813			91.2387	74.513	61.1428	23.8523	8.72631	20.9485	69.8783	57.2353	66.703			7.38
		150	100	65.4585	85.1288	85.0082	65.3783	59.0106	88.4748	91.6461	100			3.17078	4.51499	7.00112	32.5289	51.8957	26.9621	2.58805	1.1249	2.65594				150	69.9924	53.9864	40.07	35.0667	32.6149	43.203	89.5451	32.402	57.6553			98.841	84.8346	72.0161	24.5437	11.5237	19.8224	53.9765	68.7478	72.2042			7.948
		160	94.755	80.7616	81.7408	97.1415	88.4443	79.5989	86.9103	87.334	91.9219			1.99787	4.54198	7.10091	33.1739	51.5943	29.501	2.67756	1.88853	2.14987				160	49.2009	55.6826	36.1432	28.0385	38.5525	37.7831	85.1907	36.2607	54.8198			93.1397	85.1739	71.4924	26.0251	13.9305	21.9925	44.5028	68.4529	68.8401			8.516
		170	93.4335	93.684	79.5949	100	89.8145	89.1349	91.8632	79.8717	83.6761			2.85874	5.96329	6.25113	34.2817	52.7765	34.2651	3.11066	1.72632	2.88693				170	40.5611	69.6605	34.537	17.7222	37.8449	42.9597	77.4182	32.4668	56.4091			78.7224	67.3281	66.8857	25.41	12.7559	20.2149	40.0763	68.3768	55.8796			9.083
		180	91.4036	100	85.6429	94.2777	100	91.5869	87.1891	81.2365	72.7099			3.06216	5.2605	5.8202	33.2901	53.8567	31.884	3.67343	2.62834	3.95213				180	30.0541	54.8637	28.7141	15.5299	30.4746	38.7441	74.1919	30.4755	44.6109			74.8231	61.1817	61.9325	25.2472	13.4167	16.1575	42.3112	60.6876	49.4602			9.651
		190	90.7265	91.816	80.9307	85.4728	95.7253	100	77.6268	78.5199	76.8498			4.4912	7.64858	5.36643	32.9505	54.7279	30.4982	3.92858	3.44029	3.71323				190	23.7579	47.6306	19.9305	13.7218	19.0781	35.4222	82.3692	22.3797	38.758			62.1838	64.2812	64.901	27.5891	14.2755	17.9433	38.9101	58.1016	54.0678			10.219
		200	89.9728	88.5728	83.5866	87.2083	74.0436	96.5303	68.2633	71.5822	88.6417			4.02195	6.89655	6.27894	35.5979	55.5089	35.5007	4.81831	2.21988	3.69186				200	23.6013	35.8026	14.561	18.8274	15.5455	27.3255	78.349	15.0446	24.1104			48.9959	61.02	65.499	28.8114	14.4725	18.4145	37.8657	54.82	50.4569			10.786
		210	89.6345	76.0373	90.0097	93.0496	75.1209	96.4848	62.277	61.0461	86.8703			4.47112	6.75302	6.71652	32.9681	54.4932	37.1267	4.94654	2.59735	3.23293				210	20.3366	31.273	12.1349	14.2349	13.305	21.6601	60.2483	11.122	24.5937			48.0069	54.4509	61.6296	29.5547	15.5923	18.7937	31.2297	52.6626	44.9612			11.354
		220	85.3019	68.5448	87.5197	91.0522	91.4312	97.3115	55.5504	51.7032	93.0103			4.63631	6.3181	6.62921	32.1426	58.1531	37.6768	6.52114	1.29881	5.09904				220	16.1302	22.9584	11.2383	8.8661	12.5795	20.1365	44.113	7.86873	21.3032			44.9564	53.5687	49.525	32.4703	15.5821	18.3102	26.524	51.746	45.2104			11.922
		230	77.9087	77.9364	95.0335	68.6839	84.7791	91.8137	49.4538	40.2386	92.0162			5.7965	7.16352	8.16621	36.7423	58.7958	42.4503	5.48157	2.22127	7.17093				230	11.8287	16.4439	9.97815	8.52106	11.6811	17.6794	33.0504	4.50222	15.3489			40.0686	48.2327	54.9001	32.3408	18.9975	17.3962	29.4831	51.0744	44.4192			12.49
		240	65.2581	82.4169	100	54.4344	80.4245	89.8124	40.5135	37.7649	86.2586			5.33668	9.58196	7.93771	42.0335	56.2537	47.5895	4.79105	2.87316	6.58938				240	8.93989	13.7193	9.81154	7.18128	12.4741	16.3236	30.1239	4.36423	14.5598			42.0912	50.2103	58.7855	33.6865	19.0604	18.9379	27.9632	46.6182	42.8266			13.057
		250	54.1151	80.0016	89.2996	43.3584	69.3088	78.7264	31.9066	28.9524	74.4821			6.12431	9.52593	7.419	38.0794	50.4409	39.224	6.07557	2.43147	7.08736				250	8.45784	8.94835	8.91988	5.76161	13.0039	15.7476	25.4819	4.1954	11.8339			41.411	52.1526	53.928	34.8737	18.6213	18.7292	26.7974	45.8765	45.3361			13.625
		260	42.0036	86.2336	78.7284	37.9628	63.9929	82.2568	28.7267	22.957	58.6921			4.7921	10.6999	8.69058	37.5506	51.1719	36.6124	3.8933	2.80333	5.46589				260	8.81714	6.73264	7.73001	7.27641	10.9164	19.4853	18.2008	4.50836	10.9002			46.045	49.648	52.8134	35.1763	21.7899	19.3164	26.6057	50.6495	49.6517			14.193
		270	35.9324	77.3096	65.7668	31.6112	53.8626	62.3207	26.1447	22.9107	48.22			4.79677	8.47511	9.41137	38.0579	52.5095	41.7163	3.90398	2.69355	4.80996				270	7.01805	7.39474	10.6333	8.79387	11.3457	24.1822	12.922	2.46216	10.1464			54.9656	49.8108	50.8044	38.1606	22.8681	23.8023	29.1878	52.8677	45.8009			14.76
		280	33.1297	71.3489	55.1566	30.2426	44.0825	53.0803	24.6013	20.7929	40.4537			4.57356	6.56569	9.6351	34.9926	54.8541	44.6807	2.90458	3.04922	4.99881				280	7.53633	8.09959	10.5776	5.78628	12.128	16.1529	11.1802	2.09389	8.63351			51.3028	55.4105	55.3993	40.3423	21.6584	23.1117	35.0284	53.9554	52.5388			15.328
		290	26.765	59.7274	50.7586	28.7362	39.0957	50.1493	24.5823	18.5767	40.316			4.55868	6.80247	9.12278	38.7879	56.1161	43.7531	3.08132	5.51095	3.98477				290	8.9633	9.00442	9.7375	7.33024	13.7841	17.4444	11.0363	1.26291	8.25517			48.9709	57.0509	58.5502	42.1166	25.3667	21.9098	31.7158	55.5475	59.7055			15.896
		300	21.5469	46.7153	45.2567	25.3207	36.8925	40.9029	24.5098	20.4029	36.4119			6.04651	7.05167	7.71304	38.6295	58.5703	39.1755	3.65477	6.27345	4.64107				300	8.86452	8.39179	12.489	6.68446	14.2765	12.5254	11.3079	1.29279	7.80908			54.1408	57.8938	64.0238	47.0644	27.8782	26.5689	33.85	53.6767	61.7803			16.463
		310	20.4719	37.6803	38.3454	23.5994	34.3712	35.1566	27.5377	18.1346	30.0734			8.30826	9.5634	8.84138	36.0613	60.0412	39.4139	4.97326	4.75287	4.58305				310	10.9671	9.10544	11.309	6.63316	14.4929	14.379	9.08562	0.488903	7.20483			62.7562	57.6603	62.1877	52.3206	27.9005	28.9733	36.1276	56.7777	61.898			17.031
		320	19.954	33.5207	35.1052	21.4336	33.4701	34.242	23.8833	19.6215	27.7578			7.52014	8.44669	9.62898	34.2528	58.1057	37.7663	5.69317	4.13868	4.03026				320	18.6809	11.4696	11.8635	9.31466	17.8802	15.381	8.74906	0	7.07694			63.0712	60.5875	62.6881	53.7461	29.0065	32.2716	43	56.7626	65.1027			17.599
		330	18.0074	37.5457	34.3836	21.9255	32.0744	32.3628	22.4338	20.2896	28.5219			7.14527	6.9845	9.5425	32.8975	57.8213	42.4627	4.0891	5.30778	4.23017				330	16.4472	13.6613	12.8553	8.69219	15.3299	18.647	7.855	0.462944	7.16586			67.2787	61.3828	66.6596	56.2734	31.5226	32.7066	45.9129	61.2733	69.4642			18.167
		340	19.1395	32.0704	33.2315	22.8022	31.3323	31.6514	22.593	20.3405	26.6113			6.27493	7.07668	10.3226	32.3398	58.3557	39.3425	4.05876	6.27296	6.90815				340	12.0359	12.9146	13.2551	9.34502	14.9512	17.5348	7.47387	1.52647	9.21737			64.65	63.8825	68.4744	57.7291	35.5064	41.6114	50.8418	66.1618	71.3332			18.734
		350	17.5145	29.1642	35.0544	24.9104	34.0256	30.1084	20.908	20.5781	26.0667			6.38138	9.37313	10.4794	36.7993	59.7354	37.9549	5.20457	7.56796	8.01795				350	13.308	11.2711	10.2416	11.3044	17.0843	18.8281	7.57163	0.651106	8.47518			64.7723	62.3217	70.4178	60.1298	41.1423	61.0705	50.4736	71.2027	78.105			19.302
		360	18.1894	27.6759	33.5697	22.2578	33.7935	26.4493	23.4865	20.4873	27.8164			7.06941	11.3713	12.0868	32.8394	60.5521	34.2129	5.87657	7.68026	5.77495				360	11.0346	9.49536	11.8059	10.9717	17.5555	20.4365	7.48194	1.22079	8.51127			68.988	68.7112	71.3914	64.1472	42.9502	53.4815	57.3922	71.1737	76.4584			19.87
		370	20.4231	28.5825	24.6372	21.3555	33.7626	27.2774	26.3602	21.4442	31.6641			6.56223	11.0635	11.0033	32.3027	65.57	38.9592	6.95923	6.5141	6.27388				370	9.09911	8.30784	14.2792	11.895	18.7826	22.0663	7.14328	0.730768	8.64038			73.6002	70.6239	85.0903	68.8314	41.5097	42.2709	63.4219	78.459	81.0654			20.437
		380	22.3272	28.9309	21.1546	22.4092	33.1941	26.0447	27.6153	22.9338	34.2622			7.90977	10.353	10.0484	36.1228	66.9912	33.3024	8.21416	6.49912	7.73219				380	8.82544	7.11628	14.4729	14.3172	19.3354	19.94	7.05705	0.533613	8.82408			70.1786	76.0772	80.0785	66.9414	45.47	43.3065	65.874	82.7087	92.7629			21.005
		390	21.2166	28.5412	24.0158	21.2467	33.8786	25.8374	26.6487	24.5206	34.9443			11.9865	10.444	11.0214	36.1243	73.1167	32.5988	9.31953	6.67475	8.45374				390	8.84803	8.11261	10.5641	12.7526	20.9691	21.104	7.01157	1.15337	8.87675			72.794	81.2152	76.6384	72.2395	49.3714	47.4294	69.9089	75.8438	94.0158			21.573
		400	20.091	32.3937	24.6245	20.3774	32.2642	28.0152	26.5386	24.4772	36.5086			11.1216	11.7724	11.4677	40.8445	65.1502	37.5258	10.0848	7.59194	7.1825				400	8.72439	9.27033	11.6431	13.8716	20.1566	22.9486	7.05767	1.64202	8.68119			76.322	85.2261	78.131	74.4286	61.5662	60.6436	74.6255	84.9297	95.7405			22.141
		410	20.2006	32.974	27.0053	21.3353	32.3773	22.7223	28.4572	27.4297	35.1554			11.3349	11.5237	10.6581	41.2613	66.2215	33.682	8.85334	9.55416	7.94086				410	10.5796	10.3013	10.454	17.812	19.9338	33.347	8.53063	1.40588	10.0718			84.6315	84.1995	79.9234	73.7315	81.5327	60.6218	81.591	94.2716	95.6026			22.708
		420	23.4008	34.7046	28.0016	24.5318	33.2871	23.6444	28.5952	30.7949	36.4027			10.4891	13.1892	9.94138	40.4714	69.3458	35.2945	9.42378	8.96668	9.78318				420	10.437	8.19138	8.13237	18.1966	20.4387	38.0986	9.38761	1.08844	9.65903			87.1108	86.5765	85.5023	71.4097	100	60.3121	78.8867	93.1042	100			23.276
		430	23.4423	36.5164	26.0102	21.6627	34.6241	24.5198	30.0687	35.6085	37.6341			14.1571	13.534	12.4077	43.2867	70.3525	36.0258	11.0413	12.4507	9.86685				430	8.89753	7.26174	8.66293	18.0034	19.9738	32.8451	9.65973	0.527414	11.3982			91.063	95.4719	83.4685	87.5776	63.3766	73.3855	83.039	95.9529	95.3095			23.844
		440	27.6317	38.24	26.3523	22.0203	34.4711	23.8845	36.4399	39.2936	37.4332			14.0828	14.252	16.6533	44.7889	70.857	32.8145	13.1142	12.7352	15.2398				440	8.33364	6.46317	10.1311	20.1986	22.5274	36.2843	12.4119	2.22895	11.2888			100	97.2381	96.8863	100	59.9124	76.7218	84.6738	98.2891	91.7601			24.411
		450	28.1368	39.5878	27.3354	25.2431	36.5821	23.5471	39.6251	45.6704	41.463			12.8006	16.5691	15.9376	45.1676	68.831	32.6423	13.1449	13.4383	15.2203				450	6.85685	5.45234	10.4125	21.3778	22.5791	34.3809	14.0471	2.08965	10.6889			99.2294	96.7509	100	84.59	79.2898	82.8489	81.9422	100	94.003			24.979
		460	27.7152	42.6299	27.0083	23.18	35.7056	22.2918	39.5872	47.2032	49.797			12.5551	19.8111	15.2328	45.3939	65.5071	35.6006	13.9968	13.3535	13.8471				460	6.7676	5.28993	10.2624	17.9982	23.8964	38.557	15.1274	1.62445	11.6298			92.598	100	91.0826	84.0287	63.8054	96.5908	78.5309	98.0381	93.6916			25.547
		470	29.9708	42.337	25.686	23.3107	37.542	24.1591	42.0223	44.5387	50.7945			13.2462	17.4236	15.4628	45.146	58.6132	37.2395	13.5534	16.4805	15.0366				470	6.49025	4.57053	11.0451	17.2143	23.8204	43.2568	17.3933	1.92026	14.1399			86.7976	88.1003	93.0358	90.7447	63.3141	76.8154	78.8489	96.596	89.2143			26.114
		480	31.5612	41.5587	26.6849	24.8364	39.3694	24.8305	40.9862	50.8967	54.4326			11.0596	15.6354	13.6998	42.2519	56.2337	39.7889	13.8738	16.1709	15.0011				480	8.41925	4.73479	15.144	19.5224	29.0505	45.7414	16.809	3.15348	15.412			96.5984	78.9738	95.7475	94.9471	61.0906	85.9502	83.1833	88.86	79.2088			26.682
		490	31.8603	44.8868	27.5269	26.1974	37.6351	25.3307	46.6117	53.935	53.7306			9.706	15.9545	16.7381	50.0337	57.5669	42.9365	17.7719	15.3607	14.1217				490	6.60105	4.80182	14.4212	23.8959	25.3847	47.5506	17.8292	5.81998	14.1331			84.0844	73.9199	98.7895	88.4379	54.956	98.3999	100	91.2763	75.7213			27.25
		500	31.786	51.7592	26.7119	24.8364	35.6349	22.9367	47.5007	54.0117	48.345			16.9889	14.2257	18.5673	43.3614	59.0737	38.2272	18.352	15.5267	14.0226				500	7.38412	4.59273	12.3589	23.4049	28.2397	50.0588	19.6915	7.17254	18.6886			82.3965	77.7645	91.4177	94.0779	55.9314	89.9945	96.4991	91.243	69.2774			27.818
		510	33.8858	48.6085	31.3384	31.525	36.4954	24.1552	46.7372	50.4157	45.1109			12.5882	14.8643	18.1991	44.2372	57.1511	36.645	16.6201	16.3593	12.2145				510	6.90864	3.58569	7.40831	26.0599	28.7372	54.8779	20.7063	5.24402	16.8764			75.8525	69.1706	85.0056	95.1312	48.5773	87.2028	83.1921	90.296	66.2629			28.385
		520	30.9239	57.2595	33.5447	34.8334	37.8825	25.7621	55.2875	52.3322	43.9871			11.1657	11.7947	13.5194	46.9293	55.0069	34.7605	15.8485	16.0808	12.1004				520	5.28896	3.81196	6.65244	27.0848	22.2672	50.5412	21.8217	4.41372	17.0642			70.1897	74.4599	84.0584	92.3411	48.0413	82.6551	81.8138	81.0098	64.2481			28.953
		530	32.5161	53.4663	32.1548	30.879	42.6406	30.725	53.206	48.0213	40.4776			9.42543	13.8171	13.5038	41.5223	54.5887	34.9559	14.7016	17.4358	11.7209				530	5.15497	4.46232	5.68391	23.8881	26.7057	55.8055	25.3766	4.36792	17.2268			79.925	72.5441	79.5186	73.1114	51.4858	88.9929	67.2698	84.9843	62.2699			29.521
		540	33.0794	48.6801	33.7286	40.3972	37.6971	30.694	51.475	47.2099	42.9323			10.5153	14.1843	12.8645	43.8685	60.1487	35.6678	14.1114	20.8183	11.6489				540	5.18229	3.87488	5.63047	22.3713	29.4812	61.0078	28.6207	6.28182	17.5852			89.0572	67.0347	74.3384	75.2848	45.6615	87.616	60.6592	85.8922	67.4985			30.088
		550	35.0441	50.3292	42.4801	47.2626	36.0768	41.0886	55.7301	47.9938	40.0279			12.4086	12.1612	12.5867	40.4189	60.5642	36.7764	13.8261	16.3259	10.1182				550	4.792	3.21821	5.42131	21.364	23.6144	52.4214	28.312	6.49509	17.9987			90.5658	64.7385	69.7393	81.591	39.3092	89.0234	54.7679	82.5314	69.7848			30.656
		560	34.7129	54.7576	41.4685	49.0188	40.0703	34.0048	57.9409	50.2444	41.1			10.9511	10.5694	9.91802	35.2906	59.2834	34.1327	11.0362	14.4262	18.7254				560	4.93971	4.3201	4.90765	25.0853	21.4839	51.3923	27.4112	6.31948	18.2847			92.6082	65.2528	71.5788	74.2484	40.4406	94.908	54.705	77.9593	69.5216			31.224
		570	27.2085	50.2254	39.5989	41.1604	45.3443	34.4239	54.0824	52.9678	39.0377			6.44759	14.0859	9.09017	35.8918	52.5097	35.413	8.2253	12.0949	25.7411				570	5.10596	4.49709	5.4904	22.6682	21.1469	58.1992	26.663	5.6875	21.0654			77.378	64.506	59.2265	64.6329	37.0545	100	46.9046	76.4245	73.7853			31.792
		580	30.4146	46.4259	41.1388	36.468	45.2572	36.7454	54.3243	54.9381	40.4379			4.31526	24.1576	9.92035	49.053	49.5187	31.506	8.61789	12.2964	14.621				580	4.81757	2.83228	5.10465	20.5661	23.2398	49.6166	26.2875	7.43609	23.1419			64.3343	58.6705	70.1646	56.6842	25.9298	96.3983	41.1842	70.5964	83.7489			32.359
		590	35.4531	43.8754	43.6796	33.4609	43.562	42.8556	52.3753	44.909	38.8801			4.52087	21.7066	7.94689	51.3364	50.9505	30.9386	11.1861	16.9176	13.9074				590	4.07117	3.25613	5.99372	20.3467	26.7182	49.6981	24.6266	4.38361	22.0419			64.8862	52.2176	68.8249	54.067	26.5672	97.3044	49.1416	69.4576	82.9955			32.927
		600	34.1057	41.7256	46.9116	32.3157	39.5954	39.8744	52.0211	46.2057	33.892			4.55693	17.1736	6.91415	42.5621	54.9036	38.3015	9.9573	14.3538	14.5263				600	3.99626	2.70144	5.364	18.6973	25.5598	43.7051	22.725	5.10956	15.869			57.5954	59.1069	63.2624	57.3257	30.6224	74.2334	58.1266	70.1029	71.0341			33.495
		610	31.8819	44.012	39.1297	37.1558	41.4665	36.7921	55.5005	35.9233	36.7993			3.82018	18.181	6.44979	36.3479	48.6578	39.6428	13.2575	8.16798	19.4949				610	3.85057	2.85772	6.01426	18.0431	22.7743	41.6	30.0248	4.79509	16.9684			57.6394	68.0004	59.3871	71.2392	34.4003	66.7627	44.7716	63.8801	73.8963			34.062
		620	37.1716	46.5017	36.3556	35.2253	40.2604	35.0704	52.1762	36.6191	34.1024			4.71605	25.2292	7.23105	34.3471	46.396	41.6233	11.0343	7.27894	28.6845				620	3.33605	3.19157	11.0751	19.2464	21.2307	47.6647	25.7143	4.46766	20.3768			56.0074	69.5475	64.8312	59.7408	29.3101	63.9799	38.1609	56.4856	71.5586			34.63
		630	33.8135	41.0072	35.5477	31.6218	45.7787	33.3271	45.5149	29.746	33.4094			5.20836	25.6768	8.36233	32.6702	45.0177	35.5263	11.8214	7.41778	17.4492				630	4.96462	3.75677	9.75092	17.7953	23.0697	42.8009	22.9355	4.85147	19.7544			48.7178	54.6493	52.0256	67.3404	29.9054	64.0623	35.0616	54.5205	74.5303			35.198
		640	31.2401	38.4504	34.4335	32.3259	39.3794	28.5631	50.3773	34.9197	32.822			6.43506	24.9006	10.6412	33.4514	45.8299	35.2956	13.4713	8.44426	12.1336				640	5.875	4.0439	5.87913	20.5518	27.3638	52.0551	21.4741	5.19344	17.2159			52.9759	50.5631	50.0718	67.9624	36.8727	72.2435	37.0823	57.218	81.9535			35.765
		650	28.3912	38.571	37.0463	34.9636	36.97	29.3858	46.4514	31.6009	26.3775			8.46419	11.4022	10.7821	40.385	42.5729	30.4512	13.6892	9.59123	10.1843				650	4.14991	8.25398	5.03144	21.7397	24.3002	47.9336	21.3559	4.66747	21.9456			43.7849	51.438	48.6648	69.344	35.3178	62.8672	40.3665	63.8075	83.7463			36.333
		660	23.6203	37.0705	31.388	37.6476	35.2789	30.3691	45.1325	31.1987	26.2302			11.7483	10.6508	7.36478	68.0061	45.5477	28.7112	13.7794	10.4699	12.229				660	3.1955	3.92107	4.09872	28.4077	21.5028	40.7367	22.1693	3.87615	17.6422			40.8758	45.8641	46.1545	63.1272	30.0096	62.4231	52.9985	65.2601	74.5576			36.901
		670	22.8469	37.047	30.0589	32.0727	38.2891	30.3397	44.0394	30.7846	24.8257			13.1453	12.5762	4.55274	32.4311	59.9747	30.2364	14.5796	11.3592	14.9823				670	4.35449	2.84212	3.99487	29.099	23.0683	43.9936	21.7497	3.37629	17.4967			39.3768	47.6483	49.3792	61.633	26.4143	66.2123	43.9189	65.9971	74.6677			37.469
		680	24.2513	37.4523	28.8952	30.1262	39.6412	29.5075	41.5236	24.3731	26.1376			13.8533	13.9907	4.59083	29.4983	45.4089	30.4012	17.6098	15.6752	10.745				680	3.20522	3.46044	3.11429	27.6785	19.0213	37.6031	19.7526	4.57979	16.7688			39.9507	45.7798	48.3139	60.0425	28.0939	76.6053	38.0267	67.5862	68.4457			38.036
		690	21.8354	31.1044	28.4893	38.5703	49.7588	26.0294	41.1748	24.1224	21.0157			16.2984	13.1752	4.93791	36.1523	41.0295	30.0841	22.4609	13.9807	6.96432				690	3.25536	3.64267	2.50931	21.3356	23.4567	37.1114	21.0862	2.09892	14.9751			36.1552	38.6947	54.1836	68.4314	27.667	74.7304	41.238	59.5401	66.2077			38.604
		700	24.4332	33.1965	29.633	37.1587	40.4821	26.5679	36.131	22.1282	20.6958			20.2796	8.29619	5.41501	33.4865	42.0032	26.1149	18.6292	16.6617	6.75109				700	5.192	2.94903	3.35541	20.7193	32.5452	31.2452	16.1197	1.16583	10.3159			36.1434	38.9373	49.3962	67.1974	24.9141	67.4158	42.0747	57.3119	59.2152			39.172
		710	23.7262	31.1331	24.3536	28.2629	33.82	41.9578	32.6873	22.1219	19.6137			16.0242	7.09303	5.84755	35.7499	40.4966	25.1543	19.2958	17.4953	11.0181				710	4.47242	2.64519	2.75545	17.1394	20.7378	28.9248	10.4847	1.63594	15.0184			40.3506	37.4855	53.7577	67.6085	30.7288	62.5281	53.7134	58.5145	61.5001			39.739
		720	18.2522	29.4216	25.899	26.4475	37.0338	29.9807	34.435	23.1741	17.0526			14.2555	9.5252	13.792	40.2815	40.0306	26.4661	21.0118	20.946	11.4142				720	3.37787	3.52599	2.73382	14.356	16.4413	28.4101	6.71617	2.31246	16.5981			38.7043	36.6685	51.3335	69.4189	28.0052	62.9493	49.0057	59.0623	58.8771			40.307
		730	15.7694	23.5483	25.1185	26.561	34.1713	26.6476	30.3135	22.0267	13.9588			12.8568	12.4397	8.15562	39.9531	44.0804	33.9168	16.3215	21.2657	8.53587				730	3.62022	2.35377	2.88433	18.7726	14.5278	23.2412	3.99996	1.4433	18.233			35.5964	40.5382	41.324	70.6127	27.8746	64.4539	51.0279	62.2516	55.3154			40.875
		740	14.2098	23.2857	23.1509	26.8427	34.0418	33.1438	27.9007	17.5653	14.2239			13.5945	10.2157	7.42507	40.5611	44.5798	29.4216	15.3776	27.2939	9.10497				740	1.74821	1.91394	2.63513	18.6641	15.3309	22.1783	0.488735	1.3015	14.7413			35.8635	35.235	33.3449	74.0353	29.3194	73.9606	42.0883	64.5925	56.2334			41.443
		750	15.9115	22.1146	23.8498	23.7852	42.7337	27.9279	25.8429	16.0946	14.2738			12.7182	11.0264	8.22256	41.1459	40.7223	25.4028	12.1749	23.2847	10.068				750	2.54954	1.38404	2.89418	15.633	15.7203	25.8165	0	2.02218	13.8337			42.4226	28.1969	30.6033	87.5416	21.7501	78.2552	36.7469	60.8965	53.3797			42.01
		760	19.3434	23.5175	20.8221	31.6482	42.5653	30.5278	23.614	14.9884	12.7816			14.0619	10.1037	8.32312	44.7138	41.8849	26.7632	12.4824	18.8919	9.81853				760	2.12573	1.2918	3.12343	10.2777	13.8267	29.3084	2.93766	2.98328	15.5734			37.3325	30.9007	30.5446	74.6096	23.9456	69.3748	37.3454	58.1068	47.9066			42.578
		770	18.4424	21.4977	19.6246	24.1994	36.8166	33.8193	24.595	18.7107	12.1439			16.9506	8.92755	9.75838	54.0921	42.191	24.8285	12.4209	20.0888	8.65542				770	2.70818	0.992368	3.64748	9.4235	13.1165	36.4621	8.55064	9.44309	12.0428			32.1484	27.5771	30.6105	90.438	24.7159	69.5126	46.0171	59.1889	40.1648			43.146
		780	14.0359	19.1556	17.6498	24.7471	35.3934	23.9183	22.1547	17.3391	12.891			19.2548	11.4664	10.7677	50.9543	43.5829	24.9453	9.96413	19.5853	11.3328				780	2.4086	1.37804	3.70469	12.9941	13.7532	26.2281	9.9742	3.76029	12.25			32.5478	24.091	31.3705	80.8055	29.3853	63.7479	34.9236	57.6393	38.7459			43.713
		790	12.5589	17.4262	17.8682	22.7011	33.007	26.7897	22.8217	17.7805	14.1067			20.3985	18.4196	9.22259	48.4303	43.4664	22.3722	9.32399	18.5792	9.96189				790	2.48704	1.58585	3.61427	9.95296	14.4934	21.9615	16.5773	3.84846	12.5104			33.4481	25.1234	30.7782	65.219	33.3277	47.4899	22.5799	55.254	44.9156			44.281
		800	14.3767	17.5365	18.2035	21.3492	34.1108	28.5973	22.2091	15.4055	12.8546			22.0236	15.7008	8.99649	53.992	44.8688	20.9953	7.88357	20.1544	9.63079				800	2.81961	2.93059	3.98104	11.5393	12.7235	17.3447	17.3239	3.57924	12.4067			25.67	18.8567	26.3735	62.7715	37.3991	35.7781	29.6768	52.444	43.1317			44.849
		810	14.6097	16.4489	17.9479	22.7858	39.9718	27.839	21.5979	14.6104	11.3096			21.6483	14.6795	11.8194	57.315	48.7572	28.6104	9.61006	23.638	14.1071				810	2.5656	2.3036	3.70933	7.50362	10.5267	10.8577	17.4958	3.88742	11.5495			25.7143	22.5272	25.0285	49.7373	36.2885	29.82	24.989	52.1299	37.6026			45.417
		820	13.326	16.6884	18.2559	20.3131	34.0586	23.4165	21.1026	12.5178	10.4521			21.8809	17.2792	9.78343	51.9814	57.6383	30.8959	8.74948	24.7557	15.2571				820	3.18208	1.28881	3.21696	5.12281	10.4823	9.66319	15.7599	3.87935	13.0847			26.3179	20.5842	26.3103	51.6099	35.2531	33.7713	24.116	52.7412	34.1014			45.984
		830	12.8897	17.8035	17.0038	20.7796	36.1314	20.9927	17.9731	15.6574	12.2051			21.6978	17.8952	9.19531	47.2045	57.5573	21.6331	6.39425	29.3055	14.2559				830	4.07789	1.10611	3.21272	4.96067	9.37487	9.95506	15.7776	2.35404	9.99721			24.1622	18.5812	26.477	52.1899	20.0723	34.1926	24.1514	51.3481	47.3571			46.552
		840	12.357	15.3206	17.5686	17.6116	37.4468	18.6371	17.1268	14.4304	12.3614			19.5066	18.8421	10.4505	47.6077	60.8148	21.9329	4.46717	27.8689	12.8314				840	3.90042	1.60315	3.27329	3.91945	6.33339	6.03009	14.4048	2.10012	9.34978			24.892	20.5491	21.8961	42.2529	17.0568	32.7215	28.6683	57.7922	35.3878			47.12
		850	11.5408	14.7647	14.3807	16.373	34.3914	19.2935	15.3971	11.1742	10.1131			20.4651	17.1051	9.54981	46.7046	56.5485	22.394	4.22624	22.6591	11.3454				850	2.60285	1.97544	4.68744	3.52032	4.01714	7.04435	15.6438	1.63267	11.8307			21.621	19.7871	17.4434	47.2863	15.9575	25.7046	22.0229	43.9621	32.9802			47.687
		860	11.5531	12.953	15.9237	16.3918	33.0133	17.1778	19.7372	11.0939	10.6972			19.0907	18.4208	7.56687	50.9602	43.4017	21.761	5.40136	20.4269	10.7538				860	3.38691	2.56594	4.2342	4.27197	5.5125	5.47929	14.0452	2.02619	12.6568			23.0831	19.9292	19.1547	48.377	16.2985	28.1952	14.9041	42.5141	35.7018			48.255
		870	11.7628	15.3947	17.746	16.1671	34.1048	16.658	18.0808	14.0265	11.529			19.1176	17.9521	8.90869	48.1032	53.1804	20.3615	5.18506	20.4853	11.5323				870	3.3535	3.45261	3.74024	3.33661	3.9775	5.49327	14.0522	1.10968	11.8857			17.4409	19.5112	15.1942	51.8841	15.6463	29.911	16.025	35.411	27.091			48.823
		880	11.0586	15.1005	16.9784	17.24	32.966	17.6362	15.1275	13.3816	11.2181			18.9191	19.2735	9.43322	47.1033	43.1218	23.7341	5.61741	21.7333	11.9437				880	2.90014	3.4524	3.46344	1.79494	3.72692	4.57661	13.5324	1.74542	12.716			14.2652	18.6375	12.6916	64.9346	14.6148	30.6466	9.28427	37.396	21.9183			49.39
		890	9.76421	12.9246	19.286	20.0687	28.3057	18.3868	13.4925	11.5798	9.0862			25.637	21.4022	12.9298	50.6435	46.8683	19.2566	6.05054	24.5174	10.0633				890	3.14154	3.7126	5.56677	2.51146	4.01667	7.21015	12.8523	0.985756	15.0624			12.8723	14.3217	10.3249	64.8217	14.8949	35.1603	9.88559	38.0219	21.7335			49.958
		900	11.8538	15.0515	17.726	18.0698	27.3382	17.842	13.1489	11.5326	7.52979			21.6409	14.6043	9.99706	56.8333	49.7786	15.3709	8.3288	22.2779	9.08613				900	2.93697	2.21342	4.27123	2.3639	5.18948	4.49803	15.2762	1.02734	10.7402			13.8801	9.62666	15.9506	72.4923	10.3626	35.5	10.0393	31.0538	18.1299			50.526
		910	13.6942	15.526	18.2025	18.6866	27.994	22.6958	13.2084	12.4994	9.4162			16.4195	13.1372	11.8664	57.2899	48.3288	18.7478	17.5052	22.3891	6.52278				910	3.39648	1.34661	4.44227	2.7812	6.49358	4.04958	14.2035	0.864543	10.1685			13.8696	6.89607	13.6802	72.5519	15.857	41.302	14.3166	32.2326	20.4543			51.094
		920	14.179	15.1311	18.5877	19.1467	28.2653	18.0742	16.1097	10.7048	8.77718			14.3673	13.6302	10.4666	53.0774	35.342	18.9205	10.9263	22.9217	7.70336				920	3.06813	1.29332	4.25927	5.63588	6.57809	3.6357	14.5239	1.05727	9.13032			17.2555	10.4107	5.84828	71.9197	8.43109	39.3235	8.59262	36.6256	15.4352			51.661
		930	12.5311	12.9562	20.9052	20.6567	28.5372	15.0815	15.0078	12.668	12.3227			13.5532	14.1499	12.2382	44.1579	32.6039	21.5773	8.62977	25.8341	9.79688				930	4.90514	3.83248	4.15827	6.66148	6.82701	5.46215	15.2006	1.24955	11.7202			19.992	14.2015	4.80799	71.1702	10.5269	37.8718	6.79101	31.7515	14.2952			52.229
		940	10.8801	11.9395	15.5775	18.2177	29.4138	16.323	13.3258	12.444	13.8635			11.3785	14.9974	13.0169	39.7494	31.3352	30.2961	7.6164	19.8184	11.3164				940	5.08496	2.63393	5.06257	3.99055	7.60842	0.950352	17.0142	2.51105	12.8771			11.7984	10.936	10.6875	73.8218	3.6953	30.6726	7.29104	27.1974	14.456			52.797
		950	13.0027	14.0706	13.3609	18.1661	31.4383	17.2528	12.7232	9.68399	11.0444			11.1584	22.74	9.64571	37.5773	30.3827	25.1463	6.33165	18.0095	11.5065				950	6.07605	3.22001	4.78814	0	6.84413	0.317468	15.9941	2.4259	9.72726			6.59327	10.8881	6.25526	58.6558	1.59683	24.673	3.78403	23.3968	7.94			53.364
		960	11.4499	11.7157	14.6241	15.2925	35.8023	17.8341	13.0014	8.75772	6.58238			13.5265	24.1035	8.9787	38.2336	32.6762	17.7296	5.57954	19.0179	12.202				960	6.04095	2.40534	4.788	1.23021	5.63611	0	16.0641	2.88452	9.47996			5.50295	8.13863	9.79231	50.384	0	25.1519	4.76304	29.0448	4.74514			53.932
		970	10.6961	16.9094	15.8793	15.8585	36.5176	16.3705	14.2255	11.4378	7.9283			9.81277	18.7612	9.53909	36.19	40.8964	12.3904	4.53504	17.2942	9.99548				970	5.66565	2.2389	5.69913	4.22284	6.57682	1.31812	13.1757	2.33688	8.52643			6.82063	1.17927	5.81787	43.0428	2.25268	22.6746	7.40627	27.7179	7.20525			54.5
		980	9.19298	17.7958	11.6123	17.0251	31.8142	17.0045	12.8419	15.347	6.56559			9.86145	13.8794	9.62124	32.2616	47.3778	13.2241	5.06421	18.1632	13.5232				980	6.05466	2.4223	5.521	4.47831	6.99911	1.79822	15.6505	3.37768	11.0573			5.91922	1.08717	7.26816	41.9015	2.08284	24.4292	8.31571	27.5879	4.78768			55.068
		990	10.5948	12.3365	10.7698	16.6108	33.0322	16.7814	13.9696	14.1738	5.9912			9.42963	16.0117	11.1099	43.0398	27.1143	15.0884	6.649	18.0721	13.0569				990	5.94394	2.74759	4.9548	2.00886	7.98207	3.69472	16.2525	2.60389	12.7274			6.65484	2.1491	4.91345	50.9124	12.5886	26.2611	3.16949	20.2626	1.47852			55.635
		1000	8.63559	10.562	11.9973	16.6833	31.4296	16.6032	13.6245	11.4704	6.37841			11.1853	19.4962	9.71466	30.1015	28.6022	13.9708	7.72571	19.6607	14.0137				1000	5.83197	2.61364	4.48151	3.15096	9.76264	3.93785	15.4733	2.16924	11.3249			7.45272	3.2662	0	63.332	27.0695	24.6139	5.98252	20.8916	0			56.203
																																																	56.771
																																																	57.338
																																																	57.906
																																																	58.474
																																																	59.041
																																																	59.609
																																																	60.177
																																																	60.745
																																																	61.312
																																																	61.88
																																																	62.448
																																																	63.015
																																																	63.583
																																																	64.151
																																																	64.719
																																																	65.286
																																																	65.854
																																																	66.422
																																																	66.989
																																																	67.557
																																																	68.125
																																																	68.692
																																																	69.26
																																																	69.828
																																																	70.396
																																																	70.963
																																																	71.531
																																																	72.099
																																																	72.666
																																																	73.234
																																																	73.802
																																																	74.37
																																																	74.937
																																																	75.505
																																																	76.073
																																																	76.64
																																																	77.208
																																																	77.776
																																																	78.343
																																																	78.911
																																																	79.479
																																																	80.047
																																																	80.614
																																																	81.182
																																																	81.75
																																																	82.317
																																																	82.885
																																																	83.453
																																																	84.021
																																																	84.588
																																																	85.156
																																																	85.724
																																																	86.291
																																																	86.859
																																																	87.427
																																																	87.994
																																																	88.562
																																																	89.13
																																																	89.698
																																																	90.265
																																																	90.833
																																																	91.401
																																																	91.968
																																																	92.536
																																																	93.104
																																																	93.672
																																																	94.239
																																																	94.807
																																																	95.375
																																																	95.942
																																																	96.51
																																																	97.078
																																																	97.645
																																																	98.213
																																																	98.781
																																																	99.349
																																																	99.916
																																																	100.484
																																																	101.052
																																																	101.619
																																																	102.187
																																																	102.755
																																																	103.323
																																																	103.89
																																																	104.458
																																																	105.026
																																																	105.593
																																																	106.161
																																																	106.729
																																																	107.297
																																																	107.864
																																																	108.432
																																																	109
																																																	109.567
																																																	110.135
																																																	110.703
																																																	111.27
																																																	111.838
																																																	112.406
																																																	112.974
																																																	113.541
																																																	114.109
																																																	114.677
																																																	115.244
																																																	115.812
																																																	116.38
																																																	116.948
																																																	117.515
																																																	118.083
																																																	118.651
																																																	119.218
																																																	119.786
																																																	120.354
																																																	120.921
																																																	121.489
																																																	122.057
																																																	122.625
																																																	123.192
																																																	123.76
																																																	124.328
																																																	124.895
																																																	125.463
																																																	126.031
																																																	126.599
																																																	127.166
																																																	127.734
																																																	128.302
																																																	128.869
																																																	129.437
																																																	130.005
																																																	130.572
																																																	131.14
																																																	131.708
																																																	132.276
																																																	132.843
																																																	133.411
																																																	133.979
																																																	134.546
																																																	135.114
																																																	135.682
																																																	136.25
																																																	136.817
																																																	137.385
																																																	137.953
																																																	138.52
																																																	139.088
																																																	139.656
																																																	140.223
																																																	140.791
																																																	141.359
																																																	141.927
																																																	142.494
																																																	143.062
																																																	143.63
																																																	144.197
																																																	144.765
																																																	145.333
																																																	145.901
																																																	146.468
																																																	147.036
																																																	147.604
																																																	148.171
																																																	148.739
																																																	149.307
																																																	149.874
																																																	150.442
																																																	151.01
																																																	151.578
																																																	152.145
																																																	152.713
																																																	153.281
																																																	153.848
																																																	154.416
																																																	154.984
																																																	155.552
																																																	156.119
																																																	156.687
																																																	157.255
																																																	157.822
																																																	158.39
																																																	158.958
																																																	159.525
																																																	160.093
																																																	160.661
																																																	161.229
																																																	161.796
																																																	162.364
																																																	162.932
																																																	163.499
																																																	164.067
																																																	164.635
																																																	165.203
																																																	165.77
																																																	166.338
																																																	166.906
																																																	167.473
																																																	168.041
																																																	168.609
																																																	169.176
																																																	169.744
																																																	170.312
																																																	170.88
																																																	171.447
																																																	172.015
																																																	172.583
																																																	173.15
																																																	173.718
																																																	174.286
																																																	174.854
																																																	175.421
																																																	175.989
																																																	176.557
																																																	177.124
																																																	177.692
																																																	178.26
																																																	178.827
																																																	179.395
																																																	179.963
																																																	180.531
																																																	181.098
																																																	181.666
																																																	182.234
																																																	182.801
																																																	183.369
																																																	183.937
																																																	184.505
																																																	185.072
																																																	185.64
																																																	186.208
																																																	186.775
																																																	187.343
																																																	187.911
																																																	188.479
																																																	189.046
																																																	189.614
																																																	190.182
																																																	190.749
																																																	191.317
																																																	191.885
																																																	192.452
																																																	193.02
																																																	193.588
																																																	194.156
																																																	194.723
																																																	195.291
																																																	195.859
																																																	196.426
																																																	196.994
																																																	197.562
																																																	198.13
																																																	198.697
																																																	199.265
																																																	199.833
																																																	200.4
																																																	200.968
																																																	201.536
																																																	202.103
																																																	202.671
																																																	203.239
																																																	203.807
																																																	204.374
																																																	204.942
																																																	205.51
																																																	206.077
																																																	206.645
																																																	207.213
																																																	207.781
																																																	208.348
																																																	208.916
																																																	209.484
																																																	210.051
																																																	210.619
																																																	211.187
																																																	211.754
																																																	212.322
																																																	212.89
																																																	213.458
																																																	214.025
																																																	214.593
																																																	215.161
																																																	215.728
																																																	216.296
																																																	216.864
																																																	217.432
																																																	217.999
																																																	218.567
																																																	219.135
																																																	219.702
																																																	220.27
																																																	220.838
																																																	221.405
																																																	221.973
																																																	222.541
																																																	223.109
																																																	223.676
																																																	224.244
																																																	224.812
																																																	225.379
																																																	225.947
																																																	226.515
																																																	227.083
																																																	227.65
																																																	228.218
																																																	228.786
																																																	229.353
																																																	229.921
																																																	230.489
																																																	231.056
																																																	231.624
																																																	232.192
																																																	232.76
																																																	233.327
																																																	233.895
																																																	234.463
																																																	235.03
																																																	235.598
																																																	236.166
																																																	236.734
																																																	237.301
																																																	237.869
																																																	238.437
																																																	239.004
																																																	239.572
																																																	240.14
																																																	240.708
																																																	241.275
																																																	241.843
																																																	242.411
																																																	242.978
																																																	243.546
																																																	244.114
																																																	244.681
																																																	245.249
																																																	245.817
																																																	246.385
																																																	246.952
																																																	247.52
																																																	248.088
																																																	248.655
																																																	249.223
																																																	249.791
																																																	250.359
																																																	250.926
																																																	251.494
																																																	252.062
																																																	252.629
																																																	253.197
																																																	253.765
																																																	254.332
																																																	254.9
																																																	255.468
																																																	256.036
																																																	256.603
																																																	257.171
																																																	257.739
																																																	258.306
																																																	258.874
																																																	259.442
																																																	260.01
																																																	260.577
																																																	261.145
																																																	261.713
																																																	262.28
																																																	262.848
																																																	263.416
																																																	263.983
																																																	264.551
																																																	265.119
																																																	265.687
																																																	266.254
																																																	266.822
																																																	267.39
																																																	267.957
																																																	268.525
																																																	269.093
																																																	269.661
																																																	270.228
																																																	270.796
																																																	271.364
																																																	271.931
																																																	272.499
																																																	273.067
																																																	273.634
																																																	274.202
																																																	274.77
																																																	275.338
																																																	275.905
																																																	276.473
																																																	277.041
																																																	277.608
																																																	278.176
																																																	278.744
																																																	279.312
																																																	279.879
																																																	280.447
																																																	281.015
																																																	281.582
																																																	282.15
																																																	282.718
																																																	283.285
																																																	283.853
																																																	284.421
																																																	284.989
																																																	285.556
																																																	286.124
																																																	286.692
																																																	287.259
																																																	287.827
																																																	288.395
																																																	288.963
																																																	289.53
																																																	290.098
																																																	290.666
																																																	291.233
																																																	291.801
																																																	292.369
																																																	292.936
																																																	293.504
																																																	294.072
																																																	294.64
																																																	295.207
																																																	295.775
																																																	296.343
																																																	296.91
																																																	297.478
																																																	298.046
																																																	298.614
																																																	299.181
																																																	299.749
																																																	300.317
																																																	300.884
																																																	301.452
																																																	302.02
																																																	302.587
																																																	303.155
																																																	303.723
																																																	304.291
																																																	304.858
																																																	305.426
																																																	305.994
																																																	306.561
																																																	307.129
																																																	307.697
																																																	308.265
																																																	308.832
																																																	309.4
																																																	309.968
																																																	310.535
																																																	311.103
																																																	311.671
																																																	312.238
																																																	312.806
																																																	313.374
																																																	313.942
																																																	314.509
																																																	315.077
																																																	315.645
																																																	316.212
																																																	316.78
																																																	317.348
																																																	317.916
																																																	318.483
																																																	319.051
																																																	319.619
																																																	320.186
																																																	320.754
																																																	321.322
																																																	321.889
																																																	322.457
																																																	323.025
																																																	323.593
																																																	324.16
																																																	324.728
																																																	325.296
																																																	325.863
																																																	326.431
																																																	326.999
																																																	327.567
																																																	328.134
																																																	328.702
																																																	329.27
																																																	329.837
																																																	330.405
																																																	330.973
																																																	331.541
																																																	332.108
																																																	332.676
																																																	333.244
																																																	333.811
																																																	334.379
																																																	334.947
																																																	335.514
																																																	336.082
																																																	336.65
																																																	337.218
																																																	337.785
																																																	338.353
																																																	338.921
																																																	339.488
																																																	340.056
																																																	340.624
																																																	341.192
																																																	341.759
																																																	342.327
																																																	342.895
																																																	343.462
																																																	344.03
																																																	344.598
																																																	345.165
																																																	345.733
																																																	346.301
																																																	346.869
																																																	347.436
																																																	348.004
																																																	348.572
																																																	349.139
																																																	349.707
																																																	350.275
																																																	350.843
																																																	351.41
																																																	351.978
																																																	352.546
																																																	353.113
																																																	353.681
																																																	354.249
																																																	354.816
																																																	355.384
																																																	355.952
																																																	356.52
																																																	357.087
																																																	357.655
																																																	358.223
																																																	358.79
																																																	359.358
																																																	359.926
																																																	360.494
																																																	361.061
																																																	361.629
																																																	362.197
																																																	362.764
																																																	363.332
																																																	363.9
																																																	364.467
																																																	365.035
																																																	365.603
																																																	366.171
																																																	366.738
																																																	367.306
																																																	367.874
																																																	368.441
																																																	369.009
																																																	369.577
																																																	370.145
																																																	370.712
																																																	371.28
																																																	371.848
																																																	372.415
																																																	372.983
																																																	373.551
																																																	374.118
																																																	374.686
																																																	375.254
																																																	375.822
																																																	376.389
																																																	376.957
																																																	377.525
																																																	378.092
																																																	378.66
																																																	379.228
																																																	379.796
																																																	380.363
																																																	380.931
																																																	381.499
																																																	382.066
																																																	382.634
																																																	383.202
																																																	383.77
																																																	384.337
																																																	384.905
																																																	385.473
																																																	386.04
																																																	386.608
																																																	387.176
																																																	387.743
																																																	388.311
																																																	388.879
																																																	389.447
																																																	390.014
																																																	390.582
																																																	391.15
																																																	391.717
																																																	392.285
																																																	392.853
																																																	393.421
																																																	393.988
																																																	394.556
																																																	395.124
																																																	395.691
																																																	396.259
																																																	396.827
																																																	397.394
																																																	397.962
																																																	398.53
																																																	399.098
																																																	399.665
																																																	400.233
																																																	400.801
																																																	401.368
																																																	401.936
																																																	402.504
																																																	403.072
																																																	403.639
																																																	404.207
																																																	404.775
																																																	405.342
																																																	405.91
																																																	406.478
																																																	407.045
																																																	407.613
																																																	408.181
																																																	408.749
																																																	409.316
																																																	409.884
																																																	410.452
																																																	411.019
																																																	411.587
																																																	412.155
																																																	412.723
																																																	413.29
																																																	413.858
																																																	414.426
																																																	414.993
																																																	415.561
																																																	416.129
																																																	416.696
																																																	417.264
																																																	417.832
																																																	418.4
																																																	418.967
																																																	419.535
																																																	420.103
																																																	420.67
																																																	421.238
																																																	421.806
																																																	422.374
																																																	422.941
																																																	423.509
																																																	424.077
																																																	424.644
																																																	425.212
																																																	425.78
																																																	426.347
																																																	426.915
																																																	427.483
																																																	428.051
																																																	428.618
																																																	429.186
																																																	429.754
																																																	430.321
																																																	430.889
																																																	431.457
																																																	432.025
																																																	432.592
																																																	433.16
																																																	433.728
																																																	434.295
																																																	434.863
																																																	435.431
																																																	435.998
																																																	436.566
																																																	437.134
																																																	437.702
																																																	438.269
																																																	438.837
																																																	439.405
																																																	439.972
																																																	440.54
																																																	441.108
																																																	441.676
																																																	442.243
																																																	442.811
																																																	443.379
																																																	443.946
																																																	444.514
																																																	445.082
																																																	445.65
																																																	446.217
																																																	446.785
																																																	447.353
																																																	447.92
																																																	448.488
																																																	449.056
																																																	449.623
																																																	450.191
																																																	450.759
																																																	451.327
																																																	451.894
																																																	452.462
																																																	453.03
																																																	453.597
																																																	454.165
																																																	454.733
																																																	455.301
																																																	455.868
																																																	456.436
																																																	457.004
																																																	457.571
																																																	458.139
																																																	458.707
																																																	459.274
																																																	459.842
																																																	460.41
																																																	460.978
																																																	461.545
																																																	462.113
																																																	462.681
																																																	463.248
																																																	463.816
																																																	464.384
																																																	464.952
																																																	465.519
																																																	466.087
																																																	466.655
																																																	467.222
																																																	467.79
																																																	468.358
																																																	468.925
																																																	469.493
																																																	470.061
																																																	470.629
																																																	471.196
																																																	471.764
																																																	472.332
																																																	472.899
																																																	473.467
																																																	474.035
																																																	474.603
																																																	475.17
																																																	475.738
																																																	476.306
																																																	476.873
																																																	477.441
																																																	478.009
																																																	478.576
																																																	479.144
																																																	479.712
																																																	480.28
																																																	480.847
																																																	481.415
																																																	481.983
																																																	482.55
																																																	483.118
																																																	483.686
																																																	484.254
																																																	484.821
																																																	485.389
																																																	485.957
																																																	486.524
																																																	487.092
																																																	487.66
																																																	488.227
																																																	488.795
																																																	489.363
																																																	489.931
																																																	490.498
																																																	491.066
																																																	491.634
																																																	492.201
																																																	492.769
																																																	493.337
																																																	493.905
																																																	494.472
																																																	495.04
																																																	495.608
																																																	496.175
																																																	496.743
																																																	497.311
																																																	497.878
																																																	498.446
																																																	499.014
																																																	499.582
																																																	500.149
																																																	500.717
																																																	501.285
																																																	501.852
																																																	502.42
																																																	502.988
																																																	503.556
																																																	504.123
																																																	504.691
																																																	505.259
																																																	505.826
																																																	506.394
																																																	506.962
																																																	507.529
																																																	508.097
																																																	508.665
																																																	509.233
																																																	509.8
																																																	510.368
																																																	510.936
																																																	511.503
																																																	512.071
																																																	512.639
																																																	513.207
																																																	513.774
																																																	514.342
																																																	514.91
																																																	515.477
																																																	516.045
																																																	516.613
																																																	517.18
																																																	517.748
																																																	518.316
																																																	518.884
																																																	519.451
																																																	520.019
																																																	520.587
																																																	521.154
																																																	521.722
																																																	522.29
																																																	522.858
																																																	523.425
																																																	523.993
																																																	524.561
																																																	525.128
																																																	525.696
																																																	526.264
																																																	526.831
																																																	527.399
																																																	527.967
																																																	528.535
																																																	529.102
																																																	529.67
																																																	530.238
																																																	530.805
																																																	531.373
																																																	531.941
																																																	532.509
																																																	533.076
																																																	533.644
																																																	534.212
																																																	534.779
																																																	535.347
																																																	535.915
																																																	536.483
																																																	537.05
																																																	537.618
																																																	538.186
																																																	538.753
																																																	539.321
																																																	539.889
																																																	540.456
																																																	541.024
																																																	541.592
																																																	542.16
																																																	542.727
																																																	543.295
																																																	543.863
																																																	544.43
																																																	544.998
																																																	545.566
																																																	546.134
																																																	546.701
																																																	547.269
																																																	547.837
																																																	548.404
																																																	548.972
																																																	549.54
																																																	550.107
																																																	550.675
																																																	551.243
																																																	551.811
																																																	552.378
																																																	552.946
																																																	553.514
																																																	554.081
																																																	554.649
																																																	555.217
																																																	555.785
																																																	556.352
																																																	556.92
																																																	557.488
																																																	558.055
																																																	558.623
																																																	559.191
																																																	559.758
																																																	560.326
																																																	560.894
																																																	561.462
																																																	562.029
																																																	562.597
																																																	563.165
																																																	563.732
																																																	564.3
																																																	564.868
																																																	565.436
																																																	566.003
																																																	566.571
																																																	567.139
																																																	567.706
																																																	568.274
																																																	568.842
																																																	569.409
																																																	569.977
																																																	570.545
																																																	571.113
																																																	571.68
																																																	572.248
																																																	572.816
																																																	573.383
																																																	573.951
																																																	574.519
																																																	575.087
																																																	575.654
																																																	576.222
																																																	576.79
																																																	577.357
																																																	577.925
																																																	578.493
																																																	579.06
																																																	579.628
																																																	580.196
																																																	580.764
																																																	581.331
																																																	581.899
																																																	582.467
																																																	583.034
																																																	583.602
																																																	584.17
																																																	584.738
																																																	585.305
																																																	585.873
																																																	586.441
																																																	587.008
																																																	587.576
																																																	588.144
																																																	588.711
																																																	589.279
																																																	589.847
																																																	590.415
																																																	590.982
																																																	591.55
																																																	592.118
																																																	592.685
																																																	593.253
																																																	593.821
																																																	594.389
																																																	594.956
																																																	595.524
																																																	596.092
																																																	596.659
																																																	597.227
																																																	597.795
																																																	598.362
																																																	598.93
																																																	599.498
																																																	600.066
																																																	600.633
																																																	601.201
																																																	601.769
																																																	602.336
																																																	602.904
																																																	603.472
																																																	604.04
																																																	604.607
																																																	605.175
																																																	605.743
																																																	606.31
																																																	606.878
																																																	607.446
																																																	608.013
																																																	608.581
																																																	609.149
																																																	609.717
																																																	610.284
																																																	610.852
																																																	611.42
																																																	611.987
																																																	612.555
																																																	613.123
																																																	613.691
																																																	614.258
																																																	614.826
																																																	615.394
																																																	615.961
																																																	616.529
																																																	617.097
																																																	617.665
																																																	618.232
																																																	618.8
																																																	619.368
																																																	619.935
																																																	620.503
																																																	621.071
																																																	621.638
																																																	622.206
																																																	622.774
																																																	623.342
																																																	623.909
																																																	624.477
																																																	625.045
																																																	625.612
																																																	626.18
																																																	626.748
																																																	627.316
																																																	627.883
																																																	628.451
																																																	629.019
																																																	629.586
																																																	630.154
																																																	630.722
																																																	631.289
																																																	631.857
																																																	632.425
																																																	632.993
																																																	633.56
																																																	634.128
																																																	634.696
																																																	635.263
																																																	635.831
																																																	636.399
																																																	636.967
																																																	637.534
																																																	638.102
																																																	638.67
																																																	639.237
																																																	639.805
																																																	640.373
																																																	640.94
																																																	641.508
																																																	642.076
																																																	642.644
																																																	643.211
																																																	643.779
																																																	644.347
																																																	644.914
																																																	645.482
																																																	646.05
																																																	646.618
																																																	647.185
																																																	647.753
																																																	648.321
																																																	648.888
																																																	649.456
																																																	650.024
																																																	650.591
																																																	651.159
																																																	651.727
																																																	652.295
																																																	652.862
																																																	653.43
																																																	653.998
																																																	654.565
																																																	655.133
																																																	655.701
																																																	656.269
																																																	656.836
																																																	657.404
																																																	657.972
																																																	658.539
																																																	659.107
																																																	659.675
																																																	660.242
																																																	660.81
																																																	661.378
																																																	661.946
																																																	662.513
																																																	663.081
																																																	663.649
																																																	664.216
																																																	664.784
																																																	665.352
																																																	665.92
																																																	666.487
																																																	667.055
																																																	667.623
																																																	668.19
																																																	668.758
																																																	669.326
																																																	669.893
																																																	670.461
																																																	671.029
																																																	671.597
																																																	672.164
																																																	672.732
																																																	673.3
																																																	673.867
																																																	674.435
																																																	675.003
																																																	675.571
																																																	676.138
																																																	676.706
																																																	677.274
																																																	677.841
																																																	678.409
																																																	678.977
																																																	679.544
																																																	680.112
																																																	680.68
																																																	681.248
																																																	681.815
																																																	682.383
																																																	682.951
																																																	683.518
																																																	684.086
																																																	684.654
																																																	685.222
																																																	685.789
																																																	686.357
																																																	686.925
																																																	687.492
																																																	688.06
																																																	688.628
																																																	689.195
																																																	689.763
																																																	690.331
																																																	690.899
																																																	691.466
																																																	692.034
																																																	692.602
																																																	693.169
																																																	693.737
																																																	694.305
																																																	694.873
																																																	695.44
																																																	696.008
																																																	696.576
																																																	697.143
																																																	697.711
																																																	698.279
																																																	698.847
																																																	699.414
																																																	699.982
																																																	700.55
																																																	701.117
																																																	701.685
																																																	702.253
																																																	702.82
																																																	703.388
																																																	703.956
																																																	704.524
																																																	705.091
																																																	705.659
																																																	706.227
																																																	706.794
																																																	707.362
																																																	707.93
																																																	708.498
																																																	709.065
																																																	709.633
																																																	710.201
																																																	710.768
																																																	711.336
																																																	711.904
																																																	712.471
																																																	713.039
																																																	713.607
																																																	714.175
																																																	714.742
																																																	715.31
																																																	715.878
																																																	716.445
																																																	717.013
																																																	717.581
																																																	718.149
																																																	718.716
																																																	719.284
																																																	719.852
																																																	720.419
																																																	720.987
																																																	721.555
																																																	722.122
																																																	722.69
																																																	723.258
																																																	723.826
																																																	724.393
																																																	724.961
																																																	725.529
																																																	726.096
																																																	726.664
																																																	727.232
																																																	727.8
																																																	728.367
																																																	728.935
																																																	729.503
																																																	730.07
																																																	730.638
																																																	731.206
																																																	731.773
																																																	732.341
																																																	732.909
																																																	733.477
																																																	734.044
																																																	734.612
																																																	735.18
																																																	735.747
																																																	736.315
																																																	736.883
																																																	737.451
																																																	738.018
																																																	738.586
																																																	739.154
																																																	739.721
																																																	740.289
																																																	740.857
																																																	741.424
																																																	741.992
																																																	742.56
																																																	743.128
																																																	743.695
																																																	744.263
																																																	744.831
																																																	745.398
																																																	745.966
																																																	746.534
																																																	747.102
																																																	747.669
																																																	748.237
																																																	748.805
																																																	749.372
																																																	749.94
																																																	750.508
																																																	751.076
																																																	751.643
																																																	752.211
																																																	752.779
																																																	753.346
																																																	753.914
																																																	754.482
																																																	755.049
																																																	755.617
																																																	756.185
																																																	756.753
																																																	757.32
																																																	757.888
																																																	758.456
																																																	759.023
																																																	759.591
																																																	760.159
																																																	760.727
																																																	761.294
																																																	761.862
																																																	762.43
																																																	762.997
																																																	763.565
																																																	764.133
																																																	764.701
																																																	765.268
																																																	765.836
																																																	766.404
																																																	766.971
																																																	767.539
																																																	768.107
																																																	768.674
																																																	769.242
																																																	769.81
																																																	770.378
																																																	770.945
																																																	771.513
																																																	772.081
																																																	772.648
																																																	773.216
																																																	773.784
																																																	774.352
																																																	774.919
																																																	775.487
																																																	776.055
																																																	776.622
																																																	777.19
																																																	777.758
																																																	778.325
																																																	778.893
																																																	779.461
																																																	780.029
																																																	780.596
																																																	781.164
																																																	781.732
																																																	782.299
																																																	782.867
																																																	783.435
																																																	784.003
																																																	784.57
																																																	785.138
																																																	785.706
																																																	786.273
																																																	786.841
																																																	787.409
																																																	787.976
																																																	788.544
																																																	789.112
																																																	789.68
																																																	790.247
																																																	790.815
																																																	791.383
																																																	791.95
																																																	792.518
																																																	793.086
																																																	793.654
																																																	794.221
																																																	794.789
																																																	795.357
																																																	795.924
																																																	796.492
																																																	797.06
																																																	797.627
																																																	798.195
																																																	798.763
																																																	799.331
																																																	799.898
																																																	800.466
																																																	801.034
																																																	801.601
																																																	802.169
																																																	802.737
																																																	803.305
																																																	803.872
																																																	804.44
																																																	805.008
																																																	805.575
																																																	806.143
																																																	806.711
																																																	807.278
																																																	807.846
																																																	808.414
																																																	808.982
																																																	809.549
																																																	810.117
																																																	810.685
																																																	811.252
																																																	811.82
																																																	812.388
																																																	812.956
																																																	813.523
																																																	814.091
																																																	814.659
																																																	815.226
																																																	815.794
																																																	816.362
																																																	816.929
																																																	817.497
																																																	818.065
																																																	818.633
																																																	819.2
																																																	819.768
																																																	820.336
																																																	820.903
																																																	821.471
																																																	822.039
																																																	822.607
																																																	823.174
																																																	823.742
																																																	824.31
																																																	824.877
																																																	825.445
																																																	826.013
																																																	826.58
																																																	827.148
																																																	827.716
																																																	828.284
																																																	828.851
																																																	829.419
																																																	829.987
																																																	830.554
																																																	831.122
																																																	831.69
																																																	832.258
																																																	832.825
																																																	833.393
																																																	833.961
																																																	834.528
																																																	835.096
																																																	835.664
																																																	836.231
																																																	836.799
																																																	837.367
																																																	837.935
																																																	838.502
																																																	839.07
																																																	839.638
																																																	840.205
																																																	840.773
																																																	841.341
																																																	841.909
																																																	842.476
																																																	843.044
																																																	843.612
																																																	844.179
																																																	844.747
																																																	845.315
																																																	845.883
																																																	846.45
																																																	847.018
																																																	847.586
																																																	848.153
																																																	848.721
																																																	849.289
																																																	849.856
																																																	850.424
																																																	850.992
																																																	851.56
																																																	852.127
																																																	852.695
																																																	853.263
																																																	853.83
																																																	854.398
																																																	854.966
																																																	855.534
																																																	856.101
																																																	856.669
																																																	857.237
																																																	857.804
																																																	858.372
																																																	858.94
																																																	859.507
																																																	860.075
																																																	860.643
																																																	861.211
																																																	861.778
																																																	862.346
																																																	862.914
																																																	863.481
																																																	864.049
																																																	864.617
																																																	865.185
																																																	865.752
																																																	866.32
																																																	866.888
																																																	867.455
																																																	868.023
																																																	868.591
																																																	869.158
																																																	869.726
																																																	870.294
																																																	870.862
																																																	871.429
																																																	871.997
																																																	872.565
																																																	873.132
																																																	873.7
																																																	874.268
																																																	874.836
																																																	875.403
																																																	875.971
																																																	876.539
																																																	877.106
																																																	877.674
																																																	878.242
																																																	878.809
																																																	879.377
																																																	879.945
																																																	880.513
																																																	881.08
																																																	881.648
																																																	882.216
																																																	882.783
																																																	883.351
																																																	883.919
																																																	884.487
																																																	885.054
																																																	885.622
																																																	886.19
																																																	886.757
																																																	887.325
																																																	887.893
																																																	888.46
																																																	889.028
																																																	889.596
																																																	890.164
																																																	890.731
																																																	891.299
																																																	891.867
																																																	892.434
																																																	893.002
																																																	893.57
																																																	894.138
																																																	894.705
																																																	895.273
																																																	895.841
																																																	896.408
																																																	896.976
																																																	897.544
																																																	898.111
																																																	898.679
																																																	899.247
																																																	899.815
																																																	900.382
																																																	900.95
																																																	901.518
																																																	902.085
																																																	902.653
																																																	903.221
																																																	903.789
																																																	904.356
																																																	904.924
																																																	905.492
																																																	906.059
																																																	906.627
																																																	907.195
																																																	907.762
																																																	908.33
																																																	908.898
																																																	909.466
																																																	910.033
																																																	910.601
																																																	911.169
																																																	911.736
																																																	912.304
																																																	912.872
																																																	913.44
																																																	914.007
																																																	914.575
																																																	915.143
																																																	915.71
																																																	916.278
																																																	916.846
																																																	917.414
																																																	917.981
																																																	918.549
																																																	919.117
																																																	919.684
																																																	920.252
																																																	920.82
																																																	921.387
																																																	921.955
																																																	922.523
																																																	923.091
																																																	923.658
																																																	924.226
																																																	924.794
																																																	925.361
																																																	925.929
																																																	926.497
																																																	927.065
																																																	927.632
																																																	928.2
																																																	928.768
																																																	929.335
																																																	929.903
																																																	930.471
																																																	931.038
																																																	931.606
																																																	932.174
																																																	932.742
																																																	933.309
																																																	933.877
																																																	934.445
																																																	935.012
																																																	935.58
																																																	936.148
																																																	936.716
																																																	937.283
																																																	937.851
																																																	938.419
																																																	938.986
																																																	939.554
																																																	940.122
																																																	940.689
																																																	941.257
																																																	941.825
																																																	942.393
																																																	942.96
																																																	943.528
																																																	944.096
																																																	944.663
																																																	945.231
																																																	945.799
																																																	946.367
																																																	946.934
																																																	947.502
																																																	948.07
																																																	948.637
																																																	949.205
																																																	949.773
																																																	950.34
																																																	950.908
																																																	951.476
																																																	952.044
																																																	952.611
																																																	953.179
																																																	953.747
																																																	954.314
																																																	954.882
																																																	955.45
																																																	956.018
																																																	956.585
																																																	957.153
																																																	957.721
																																																	958.288
																																																	958.856
																																																	959.424
																																																	959.991
																																																	960.559
																																																	961.127
																																																	961.695
																																																	962.262
																																																	962.83
																																																	963.398
																																																	963.965
																																																	964.533
																																																	965.101
																																																	965.669
																																																	966.236
																																																	966.804
																																																	967.372
																																																	967.939
																																																	968.507
																																																	969.075
																																																	969.642
																																																	970.21
																																																	970.778
																																																	971.346
																																																	971.913
																																																	972.481
																																																	973.049
																																																	973.616
																																																	974.184
																																																	974.752
																																																	975.32
																																																	975.887
																																																	976.455
																																																	977.023
																																																	977.59
																																																	978.158
																																																	978.726
																																																	979.293
																																																	979.861
																																																	980.429
																																																	980.997
																																																	981.564
																																																	982.132
																																																	982.7
																																																	983.267
																																																	983.835
																																																	984.403
																																																	984.971
																																																	985.538
																																																	986.106
																																																	986.674
																																																	987.241
																																																	987.809
																																																	988.377
																																																	988.944
																																																	989.512
																																																	990.08
																																																	990.648
																																																	991.215
																																																	991.783
																																																	992.351
																																																	992.918
																																																	993.486
																																																	994.054
																																																	994.622
																																																	995.189
																																																	995.757
																																																	996.325
																																																	996.892
																																																	997.46
																																																	998.028
																																																	998.596
																																																	999.163
																																																	999.731

## Sheet: Figure 2
	Figure 2C (rBLA-evoked EPSC, normalized to PL L2 CA response)							Figure 2D (cBLA-evoked EPSC, normalized to IL L5 PT response)							Figure 2F (rBLA-evoked EPSC subcellular mapping onto PL L2 CA)													Figure 2F (cBLA-evoked EPSC subcellular mapping onto IL L5 PT)
		PL CA	IL CA	PL PT	IL PT				PL CA	IL CA	PL PT	IL PT
		1		0.015899	0.120045				0.011966		0.010841	1			75	4.6095	3.44701	4.07785	9.73264	4.29643	5.77532	10.0804	4.86815	5.1156	5.02866			75	5.68297	4.81735	2.61683	5.90296	4.09807	4.82295	2.55562	2.49332	3.09757	3.91442
		1		0.009262	0.003604				0.486275		0.008956	1			150	6.82568	6.46981	8.21594	21.5541	99.6122	66.748	23.6675	11.2291	4.44173	4.94298			150	2.83153	3.06431	5.12061	3.47427	3.38978	3.48566	4.61817	4.28659	2.05161	5.57103
		1		0.007274	0.365192				0.998296		0.010654	1			225	6.23438	1.58825	9.68859	20.1709	87.7634	106.658	9.90436	3.36059	5.99604	2.36707			225	1.64764	3.07117	4.13058	3.91949	2.23657	4.13472	7.6705	2.59597	3.3618	2.46649
		1		0.013603	0.007263						0.003544	1			300	4.55624	6.92939	3.70679	6.31594	15.5754	3.22471	2.99094	4.9347	5.04125	7.64026			300	5.89125	2.29475	3.50122	21.1545	10.7651	26.6771	7.40435	3.06407	3.0124	3.38569
		1		0.019798	0.214948				0.076444		0.095405	1			375	7.14068	3.29008	1.93564	5.77217	9.17588	8.2719	4.39931	5.03713	3.32191	3.36743			375	1.88414	2.73935	3.94545	22.8563	40.4685	55.9004	22.6199	4.37293	3.20706	2.4811
		1	0.000518		0.825533				0.001554		0.007943	1			450	5.56588	3.65642	6.4631	7.32569	4.76873	5.69737	5.9414	1.77085	4.4172	4.05641			450	3.42711	4.08806	2.71229	21.2498	57.3156	81.9628	6.6518	3.33519	2.72667	4.26967
		1	0.097913							0.000846	0.002834	1			525	4.4304	3.55639	4.07537	6.80778	7.12534	6.22111	-0.0667219	3.56856	8.48069	4.55234			525	2.44947	4.38887	4.20463	4.93224	36.362	72.8963	15.9855	3.48846	3.62035	3.40065
		1	0.008646	0.039168	0.041623					0.801446		1			600	2.12246	5.82125	3.52439	3.98693	-1.2095	3.34335	7.13772	6.111	5.01275	2.74177			600	2.89127	2.91009	4.03671	2.83793	7.57213	27.8364	12.1918	5.67974	3.43722	3.40778
		1	0.013825	0.080921	0.71944					0.053865	0.002911	1			675	4.73313	5.12537	5.53967	3.30667	6.98857	7.20488	4.46028	4.46807	6.43923	6.38792			675	3.19377	6.17827	3.60453	3.55106	2.34904	3.32353	1.96861	2.40869	3.47377	1.7964
		1	0.02797							0.826695		1			750	4.16255	5.67215	7.205	6.60624	4.10184	4.41241	5.28692	2.50613	4.03142	3.59784			750	2.77099	3.19172	3.32015	3.35876	4.94897	2.02054	1.76832	4.13467	3.33802	2.66807
		1	0.940224						0.029179	0.27957		1
		1	0.004773	0.093604					0.17614	0.117445		1
		1	0.594423							0.1614		1

## Sheet: Figure 2-S1
	Figure 2-S1C (rBLA evoked EPSCs)						Figure 2-S1F (cBLA evoked EPSCs)						Figure 2-S1I (rBLA-evoked EPSC subcellular mapping onto PL L5 PT)												Figure 2-S1J
		PL L2 CA	PL L2 CC	IL L5 CA				IL L5 PT	IL L5 CA																	IL CA			PL CA			IL PT			PL PT
		244.467	179.187	3.98461				259.83	7.7626				75	5.99407	5.38649	3.31183	6.13683	4.86562	1.61595	5.33516	4.7581	5.46007	3.78529		0	0	0	0	0	0	0	0	0	0	0	0	0
		491.673	61.7391	427.043				359.137	11.7139				150	5.05853	5.5687	9.05005	6.86229	10.415	7.24584	4.96636	6.48219	6.89512	5.59871		50	0	0	0	0	0	0	0	0	0	0	0	0
		159.392	1.1821	11.7321				143.476	4.89131				225	5.84066	6.2756	19.0362	5.43188	6.67094	15.0318	4.47952	6.10506	6.03127	7.04766		100	2	0	0	0	0	0	0	0	0	0	0	0
		205.388	79.8196	23.057				167.16	36.1309				300	4.58108	4.55833	6.68019	7.27497	6.4136	6.92343	3.36032	5.77275	5.87629	7.61503		150	5	3	0	9	10	2	0	0	0	0	0	0
		132.559	1.49084	15.291				165.467	4.13082				375	5.79312	4.69841	4.80257	9.93863	7.00723	6.02942	7.76172	3.42535	4.14205	6.47661		200	12	9	9	4	4	7	0	0	0	0	0	3
		96.3087	0.843142	16.0017				147.031	54.9563				450	4.46526	4.81911	4.8241	7.01273	6.96984	6.59565	5.08775	5.71239	13.863	5.42893		250	9	7	8	0	2	6	0	0	0	0	1	0
		270.41	267.934	1.09883				142.412	13.8356				525	5.35588	5.05545	20.4259	7.45755	5.72113	7.73067	5.98649	4.86377	2.64813	6.54841		300	18	11	2	0	1	0	0	0	0	0	0	0
													600	5.46338	4.32786	3.52305	3.67276	5.58975	7.42297	7.66819	8.49188	3.07686	4.71388		350	6	14	7	1	1	5	1	0	0	2	0	0
	Figure 2-S1G (rBLA-evoked EPSC)						Figure 2-S1H (cBLA-evoked EPSC)						675	5.91347	6.81963	3.492	7.27356	5.96768	3.68385	5.82496	5.80565	5.63321	6.17525		400	3	3	5	0	0	1	5	1	0	7	2	3
		PL L2 CA	IL L2 CA	PL L5 PT	IL L5 PT			PL L2 CA	IL L2 CA	PL L5 PT	IL L5 PT		750	5.1061	4.07479	5.78804	12.4349	7.15875	9.0506	2.98374	7.15817	7.17397	4.21423		450	2	0	2	1	1	1	3	4	5	15	7	11
		293.52		4.66678	35.2355			1.43676		1.30169	120.066														500	2	0	2	0	0	0	8	3	0	10	14	12
		361.558		3.34879	1.30288			147.321		2.71325	302.958														550	1	0	0	0	1	0	9	2	3	8	17	8
		364.137		2.64865	132.98			255.383		2.72561	255.819														600	0	0	0	0	0	0	9	4	4	10	9	9
		128.354		1.74597	0.932214					0.656202	185.147														650	0	0	2	0	0	1	3	14	8	1	5	8
		180.212		3.56786	38.7362			7.9227		9.88787	103.641														700	0	0	0	0	1	1	0	3	4	0	8	7
		163.005	0.084391		134.566			0.575561		2.94219	370.414														750	0	0	0	0	0	0	0	0	0	0	0	2
		249.582	24.4373						0.157264	0.526929	185.912														800	0	0	0	0	1	0	3	0	1	0	0	0
		214.326	1.85313	8.39482	8.9208				128.673		160.551														850	0	0	1	0	2	1	1	0	0	0	0	0
		284.371	3.93144	23.0116	204.588				32.1226	1.73597	596.35														900	0	0	0	0	1	0	0	0	0	0	0	0
		108.122	3.02422						133.026		160.913														950	0	0	0	0	0	0	0	0	0	0	0	0
		118.709	111.613					10.7942	103.42		369.925														1000	0	0	0	0	0	1	0	1	0	0	0	0
		288.519	1.37697	27.0064				71.1608	47.4477		404.001
		177.239	105.355						29.2729		181.369

## Sheet: Figure 3
	Figure 3B (rBLA-evoked EPSC)				Figure 3B (rBLA-evoked IPSC)				Figure 3B (rBLA-evoked EPSC/IPSC ratio)					Figure 3D (cBLA-evoked EPSC)				Figure 3D (cBLA-evoked IPSC)				Figure 3D (cBLA-evoked EPSC/IPSC ratio)					Figure 3E (rBLA-evoked activity)					Figure 3F (cBLA-evoked activity)
		PL CA	IL PT			PL CA	IL PT			PL CA	IL PT				PL CA	IL PT			PL CA	IL PT			IL PT					PL CA	IL PT				PL CA	IL PT
		692.066	88.1716			761.888	551.007			0.908357	0.160019				9.37648	182.919			3.43461	1259.44			0.145238					1	0				0	1
		219.851	53.0728			525.598	473.091			0.418287	0.112183				53.2779	988.698			2.7397	1290.48			0.766147					0.636364	0				0	1
		672.075	454.048			650.011	1222.35			1.03394	0.371455				26.8397	176.48			196.173	674.004			0.261838					0.818182	0.875				0	1
		299.605	273.736			247.572	33.9785			1.26033	0.515594				68.9241	138.352			3.30448	1012.67			0.136621					1	1				0	1
		312.023	17.5191			101.723	380.571			3.40543	0.046225				43.9845	749.995			9.92177	1005.15			0.746152					1	0				0	0.888889
		346.41	17.5919			403.636	379.329			0.859894	0.040224				1.16989	135.655			0.65744	227.16			0.597178					0.818182	0				0	1
		347.084	15.2583			457.316	607.904			0.689405	0.235281				10.2576	530.254			0.467143	538.555			0.984587					1	0				0	1
		315.276	143.028																									0.75	0

## Sheet: Figure 3-S1
	Figure 3-S1B (rBLA-evoked EPSC)							Figure 3-S1B (rBLA-evoked IPSC)							Figure 3-S1D (cBLA-evoked EPSC)							Figure 3-S1D (cBLA-evoked IPSC)							Figure 3-S1E (EPSC PPR)
		IL L2 CA	PL L2 CA	IL L5 PT	PL L5 PT				IL L2 CA	PL L2 CA	IL L5 PT	PL L5 PT				IL L2 CA	PL L2 CA	IL L5 PT	PL L5 PT				IL L2 CA	PL L2 CA	IL L5 PT	PL L5 PT					rBLA to PL L2 CA
		4.90422	692.066	88.1716					2.18792	761.888	551.007					42.4775	9.37648	182.919					19.4653	3.43461	1259.44					Pulse 1	1	1	1	1	1	1	1	1	1	1	1	1	1	1	1	1	1	1	1
		5.53738	219.851	53.0728					30.264	525.598	473.091					79.4441	53.2779	988.698					2.56316	6.99728	1290.48					Pulse 2	1.32018	1.5309	1.13702	0.993698	1.32041	1.50599	1.44563	1.09698	1.10549	1.13016	1.31973	1.54393	1.39586	1.55834	2.1412	1.47883	2.47476	0.950706	0.677648
			672.075	454.048	582.105					650.011	1222.35	1276.75				37.5836	26.8397	176.48					2.59836	196.173	674.004					Pulse 3	1.10521	1.5239	1.10126	1.02438	1.18239	1.5981	1.41902	0.90755	0.883607	1.10099	1.20165	1.4964	1.55294	1.6094	2.09094	1.2192	2.36508	0.848578	0.597956
		24.1411	299.605	273.736												9.57296		810.627					1.07137		1178.27					Pulse 4	0.938945	1.41642	1.01173	0.863058	1.04824	1.1907	1.26741	0.709031	0.911956	0.951766	1.0617	1.31872	1.45312	1.34261	1.96522	1.04673	2.51815	0.767792	0.489205
			312.023	17.5191						247.572	33.9785					20.5456	68.9241	138.352					0.385371	3.05042	1012.67					Pulse 5	0.865431	1.07873	0.956465	0.764637	0.932621	1.21081	1.172	0.692561	0.726556	0.818547	0.914746	1.12803	1.31895	1.22242	1.66507	0.929957	1.75708	0.768156	0.446017
			346.41	17.5919	27.33					101.723	380.571	248.184					43.9845	749.995						9.92177	1005.15
			347.084	15.2583	28.1822					403.636	379.329	79.8087				7.39931		275.636	26.0777				2.23626		1711.16	68.4178
		12.2831	315.276	143.028	210.34				72.3828	457.316	607.904	1099.12					1.16989	135.655						0.65744	227.16						rBLA to IL L5 PT
		50.1257	423.741		665.954				130.041	342.535		1049.11					10.2576	530.254						0.467143	538.555					Pulse 1	1	1	1	1	1	1	1
		57.1214	272.092						0.999933	192.898								188.478	2.23557						398.742	17.428				Pulse 2	1.10202	1.22836	1.17131	1.39855	2.06251	1.99177	1.10038
		17.3429	898.109						6.68715	759.226								298.236	13.8158						446.377	59.3161				Pulse 3	0.913286	0.902987	1.16208	1.35233	1.88075	1.85128	0.946111
		24.5791	389.04						18.3824	82.9662								201.509	0.684971						526.098	16.129				Pulse 4	1.08753	0.609777	1.14856	1.29212	1.23153	2.06045	0.719962
			212.438		16.625					274.293		231.404						380.888	0.162781						707.094	12.8064				Pulse 5	0.845751	0.591151	0.983738	1.0773	1.16349	1.06973	0.783443
			153.25		5.0841					242.72		187.029						497.848	0.196151						749.943	5.27435
			118.642		3.73442					85.3026		19.8705						269.916	7.09717						1801.75	22.2695
			328.803		2.48108					49.367		113.833						496.796	0.453881						1214.66	0.176568					rBLA to PL L5 PT
			98.1582		5.52596					4.08269		12.8685																		Pulse 1	1	1	1	1	1	1	1	1	1	1	1	1
			274.55		22.5699					91.1385		46.7194																		Pulse 2	1.27993	2.80928	8.58316	0.976446	0.841322	0.695791	1.18271	1.03685	1.99841	1.28534	1.94373	0.950874
			364.1		49.0389					568.783		539.049																		Pulse 3	1.07295	2.91286	6.78735	0.736608	0.763501	0.772679	5.68305	8.75581	1.3456	1.23448	2.31388	0.507353
																														Pulse 4	0.760228	3.11879	1.45943	0.702086	0.708298	0.461784	2.30241	11.6331	4.75171	0.87845	1.93542	0.141685
																														Pulse 5	0.626745	3.17681	1.76978	0.444485	0.57835	0.495213	0.926915	2.75611	0.808	0.988791	2.31797	0.081457
	Figure 3-S1F rBLA EPSC ratio							Figure 3-S1F rBLA IPSC ratio							Figure 3-S1G cBLA EPSC ratio							Figure 3-S1G cBLA IPSC ratio
		PL CA	IL CA	PL PT	IL PT				PL CA	IL CA	PL PT	IL PT				PL CA	IL CA	PL PT	IL PT				PL CA	IL CA	PL PT	IL PT
		1	0.007086		0.127403				1	0.002872		0.723213				0.05126	0.23222		1				0.002727	0.015456		1					cBLA to IL L5 PT
		1	0.025187		0.241403				1	0.05758		0.9001				0.053887	0.080352		1				0.005422	0.001986		1				Pulse 1	1	1	1	1	1	1	1	1	1	1	1	1	1	1	1	1
		1		0.866131	0.675591				1		1.9642	1.88051				0.152084	0.212962		1				0.291056	0.003855		1				Pulse 2	1.00811	1.00035	1.42815	0.744986	1.17388	0.919397	1.16088	1.3254	1.24629	0.823215	1.56544	0.958071	0.947437	1.15884	1.31553	0.936844
		1	0.080576		0.913656				1								0.011809		1					0.000909		1				Pulse 3	0.782357	0.77139	1.19723	0.564839	0.925007	0.673436	1.08972	1.27637	1.125	0.618628	1.47703	0.879113	0.98091	0.85627	1.31883	0.856768
		1			0.056147				1			0.137247				0.498179	0.148502		1				0.003012	0.000381		1				Pulse 4	0.670447	0.636083	0.934767	0.418541	0.856626	0.594459	0.972617	1.09916	0.905699	0.484466	1.43394	0.844039	0.727543	0.622939	1.07409	0.748082
		1		0.078895	0.050783				1		2.4398	3.74125				0.058646			1				0.009871			1				Pulse 5	0.659025	0.618377	0.718913	0.388835	0.71573	0.557911	0.856304	1.03234	0.786147	0.462982	1.38671	0.687627	0.656038	0.530525	0.917738	0.590868
		1		0.081197	0.043961				1		0.197724	0.93978					0.026844	0.094609	1					0.001307	0.039983	1
		1	0.03896	0.667161	0.45366				1	0.158277	2.40341	1.32929				0.008624			1				0.002894			1
		1	0.118293	1.57161					1	0.379643	3.06278					0.019345			1				0.000867			1
		1	0.209934						1	0.005184								0.011861	1						0.043707	1
		1	0.01931						1	0.008808								0.046325	1						0.132883	1
		1	0.063179						1	0.221565								0.003399	1						0.030658	1
		1		0.078258					1		0.843638							0.000427	1						0.018111	1
		1		0.033175					1		0.770555							0.000394	1						0.007033	1
		1		0.031476					1		0.232941							0.026294	1						0.01236	1
		1		0.007546					1		2.30585							0.000914	1						0.000145	1
		1		0.056296					1		3.15197
		1		0.082207					1		0.51262
		1		0.134685					1		0.947723
																													Figure 3-S1E (IPSC PPR)
																															rBLA to PL L2 CA
																														Pulse 1	1	1	1	1	1	1	1	1	1	1	1	1	1	1	1	1	1	1
																														Pulse 2	1.05516	1.24329	1.36521	0.966327	3.7523	1.68454	0.690861	1.20202	1.72483	1.9078	5.61247	2.31111	1.40785	1.72787	4.60145	23.1494	0.198246	0.411706
																														Pulse 3	0.982191	1.09118	1.26613	1.12927	4.11469	1.54319	0.512281	1.05924	1.48103	1.863	6.45048	2.50021	1.34498	3.36559	4.3022	18.2988	0.150629	0.140402
																														Pulse 4	0.821772	0.780982	1.03627	0.601003	2.40577	0.788882	0.396618	0.856022	1.04075	1.36117	4.84554	1.44671	0.852516	1.91286	3.70757	8.28925	0.00333477	0.0532994
																														Pulse 5	0.535834	0.383098	0.752691	0.632444	1.65352	0.425517	0.280567	0.810444	1.05266	1.11735	3.49887	1.05795	0.556407	0.927681	4.03909	14.7534	0.0178656	0.01783
																															rBLA to IL L5 PT
																														Pulse 1	1	1	1	1	1	1	1
																														Pulse 2	0.70756	1.07582	0.885973	3.84771	0.967223	0.502746	0.920566
																														Pulse 3	0.559612	0.770137	0.875919	1.25432	0.821092	0.34923	0.705891
																														Pulse 4	0.39163	0.393603	0.822519	0.884196	0.378391	0.101653	0.462267
																														Pulse 5	0.349514	0.355682	0.746338	1.69006	0.255793	0.0838382	0.382226
																															rBLA to PL L5 PT
																														Pulse 1	1	1	1	1	1	1	1	1	1	1	1	1
																														Pulse 2	1.20425	0.479547	4.92445	0.603687	0.872349	2.30294	0.803623	1.73304	1.42228	1.57988	1.24737	0.937936
																														Pulse 3	1.02804	0.34773	3.09068	0.36344	0.629884	3.26697	0.714068	1.16929	0.42951	2.91712	0.739787	0.336383
																														Pulse 4	0.761164	0.264859	1.35873	0.238834	0.521668	1.72603	0.644292	1.03283	0.746334	2.84505	0.169499	0.289157
																														Pulse 5	0.497279	0.231077	0.626704	0.08544	0.474242	1.1447	0.263865	0.996496	0.50004	1.59905	0.275746	0.171639
																															cBLA to IL L5 PT
																														Pulse 1	1	1	1	1	1	1	1	1	1	1	1	1	1	1	1	1
																														Pulse 2	0.664295	1.1862	1.16177	1.2505	1.06659	1.13923	1.04005	1.2333	0.753777	0.248795	0.848652	1.1378	0.485817	1.10583	0.795148	0.723355
																														Pulse 3	0.36407	0.739663	0.54793	0.865991	0.496599	1.01017	0.764518	0.627524	0.754871	0.181415	0.498038	0.928426	0.273367	1.03833	0.721704	0.380067
																														Pulse 4	0.206335	0.720698	0.250419	0.634402	0.420133	0.591234	0.564167	0.433177	0.589293	0.185417	0.396114	0.7275	0.199156	0.830666	0.599662	0.192024
																														Pulse 5	0.23748	0.45737	0.171203	0.419355	0.331378	0.56185	0.492749	0.312857	0.417251	0.137615	0.283312	0.566407	0.10989	0.651263	0.446377	0.0770456

## Sheet: Figure 4
	Figure 4E			Figure 4F			Figure 4F
		rBLA responsive Units			rBLA activated units			rBLA suppressed units
	PL L2	20.1299		PL L2	18.1818		PL L2	1.94805
	IL L2	9.81595		IL L2	5.52147		IL L2	4.29448
	PL L5	20		PL L5	7.64706		PL L5	12.3529
	IL L5	23.913		IL L5	9.93789		IL L5	13.9752
	Figure 4E			Figure 4G			Figure 4G
		cBLA responsive Units			cBLA activated units			cBLA supressed units
	PL L2	2.5974		PL L2	1.2987		PL L2	1.2987
	IL L2	7.5		IL L2	5		IL L2	2.5
	PL L5	12.8713		PL L5	3.9604		PL L5	8.91089
	IL L5	26.5823		IL L5	17.7215		IL L5	8.86076

## Sheet: Figure 4-S2
	Figure 4-S2C
	cBLA to IL L2	cBLA to PL L2	cBLA to IL L5	cBLA to PL L5	rBLA to IL L2	rBLA to PL L2	rBLA to IL L5	rBLA to PL L5
	8.75714	10	5.53	10.6691	4.455	6.575	4.38095	7.625
	11		5.89147	11.0488	4.64	7.38191	5.34104	7.66667
	11.1379		6.27638	11.48	6.13	8.14365	6.31579	8.06604
	15.3125		6.66	11.6972	8.52632	8.60377	6.33333	8.96774
			7.3089	12.6286	9.38095	8.71429	7.13043	9.31884
			7.42069	12.814	9.83019	9.35294	7.52174	9.45
			7.70588	13.5743	9.96296	9.45455	7.84615	9.49153
			7.75758	14.1111	12.1765	9.47938	8.125	9.62821
			8.31313		14.1892	9.72	8.16364	9.69355
			8.4			11.3125	8.48387	10.0851
			8.72973			11.5217	8.85246	10.1169
			8.74			11.6786	9.25556	10.3235
			8.90909			11.9167	9.75	10.4271
			9.5			12.2105	9.88372	10.543
			9.57333			12.25	10.0909	10.75
			9.6			12.2917	10.2727	10.837
			10.2059			12.7407	10.3041	11.0652
			10.6727			12.9429	10.3333	11.587
			10.6742			13.1389	10.6067	11.6552
			10.7788			13.1667	10.75	11.9906
			11.0526			13.1932	10.8125	12.5185
			11.1786			13.6	11.0811	13.5263
			11.5			14	11.1148	13.88
			11.6944			14.1045	11.2	16.1111
			11.7071			14.5195	11.3158	16.3265
			11.7895			14.6957	11.4228	16.3333
			11.9474			15.0833	11.871
			11.9688			15.2	11.9444
			11.9779				12.1852
			12.1				12.6857
			12.8108				13.0769
			12.9759				19.4583
			13.1522
			13.2632
			13.4167
			13.5
			13.8
			14.1364
			14.2105
			14.5
			16.7714
			17.1304

## Sheet: Figure 5
	Figure 5C							Figure 5F							Figure 5I
	PL L2 -> PL L5							IL L5 -> PL L5							PL L2 -> IL L5
		Sub.	Super. EPSC	Sub.	Super. IPSC				Sub.	Super. EPSC	Sub.	Super. IPSC				Sub.	Super. EPSC	Sub.	Super. IPSC
		12.4218	264.453								4.70015	5.60707				2.22859	0.811133
		22.6503	82.4575								1.98553	7.01963				0.867882	2.29061
		25.8011	22.2721								2.62031	98.5543				25.2448	33.0798
											10.9944	17.0881				1.49675	4.74116
		2.93107	85.807								4.64891	146.126				2.28418	1.84359
		0.064869	117.452								10.5174	1.86621				0.0132217	0.87868
		1.99047	103.225								15.1709	172.507				0.204422	2.98263
		0.563091	116.4								12.3194	28.5978				0.341308	6.68048
		2.56205	108.267								2.87113	12.1703						12.5514	18.6355
				2.08918	726.791				1.09118	1.13744								5.35203	5.19336
									1.75541	2.68878								5.00638	29.88
				47.2077	562.395				2.96984	1.61628								3.04731	9.49957
				17.3009	438.538				0.143612	7.52159								12.3094	8.05007
				29.216	960.746				4.10259	9.69874								0.375931	3.60619
				18.291	662.819				0.040522	11.516								1.17133	1.02443
				5.76519	439.888				21.5153	42.4243								20.1368	11.4651
				4.47189	142.479				7.37519	6.85629
				9.79881	129.594				0.448774	33.532

[truncated: 5 more sheets: Figure 5-S1, Figure 6, Figure 6-S1, Figure 7, Figure 7-S1]
