# Supplementary figures and images for: Rostral and caudal basolateral amygdala engage distinct circuits in the prelimbic and infralimbic prefrontal cortex
Source: eLife journal article supplement (doi:10.7554/elife.82688), 2022-12-07

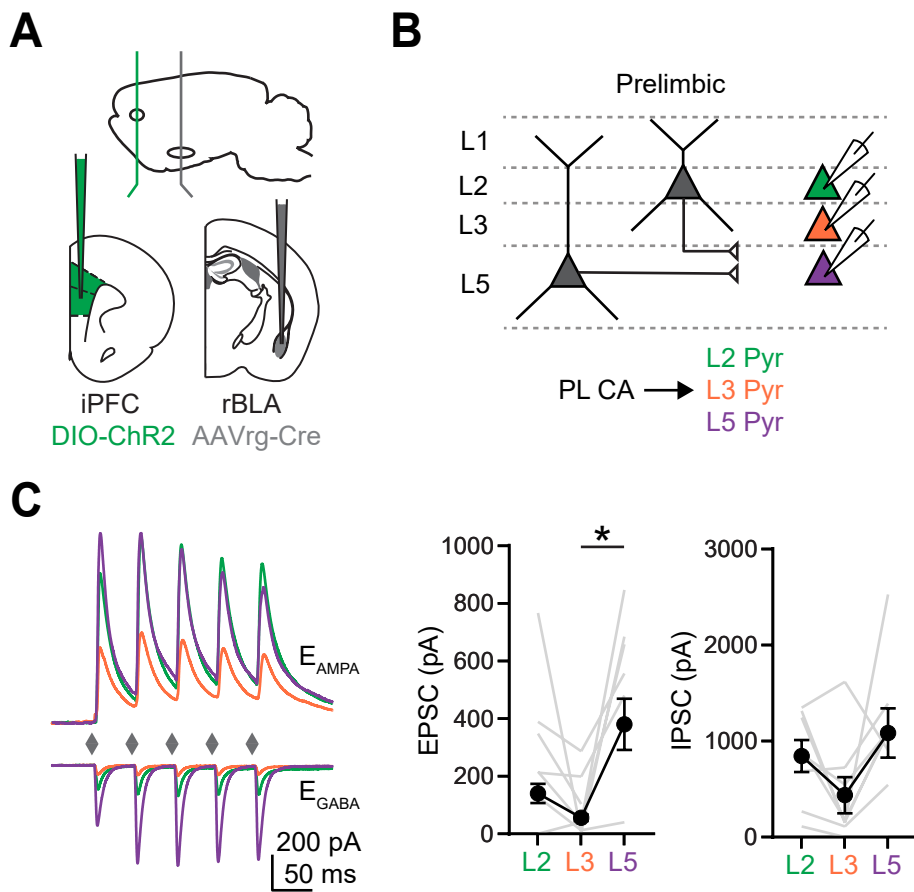

Supplement: supp [file elife-82688-supp-v1.zip]

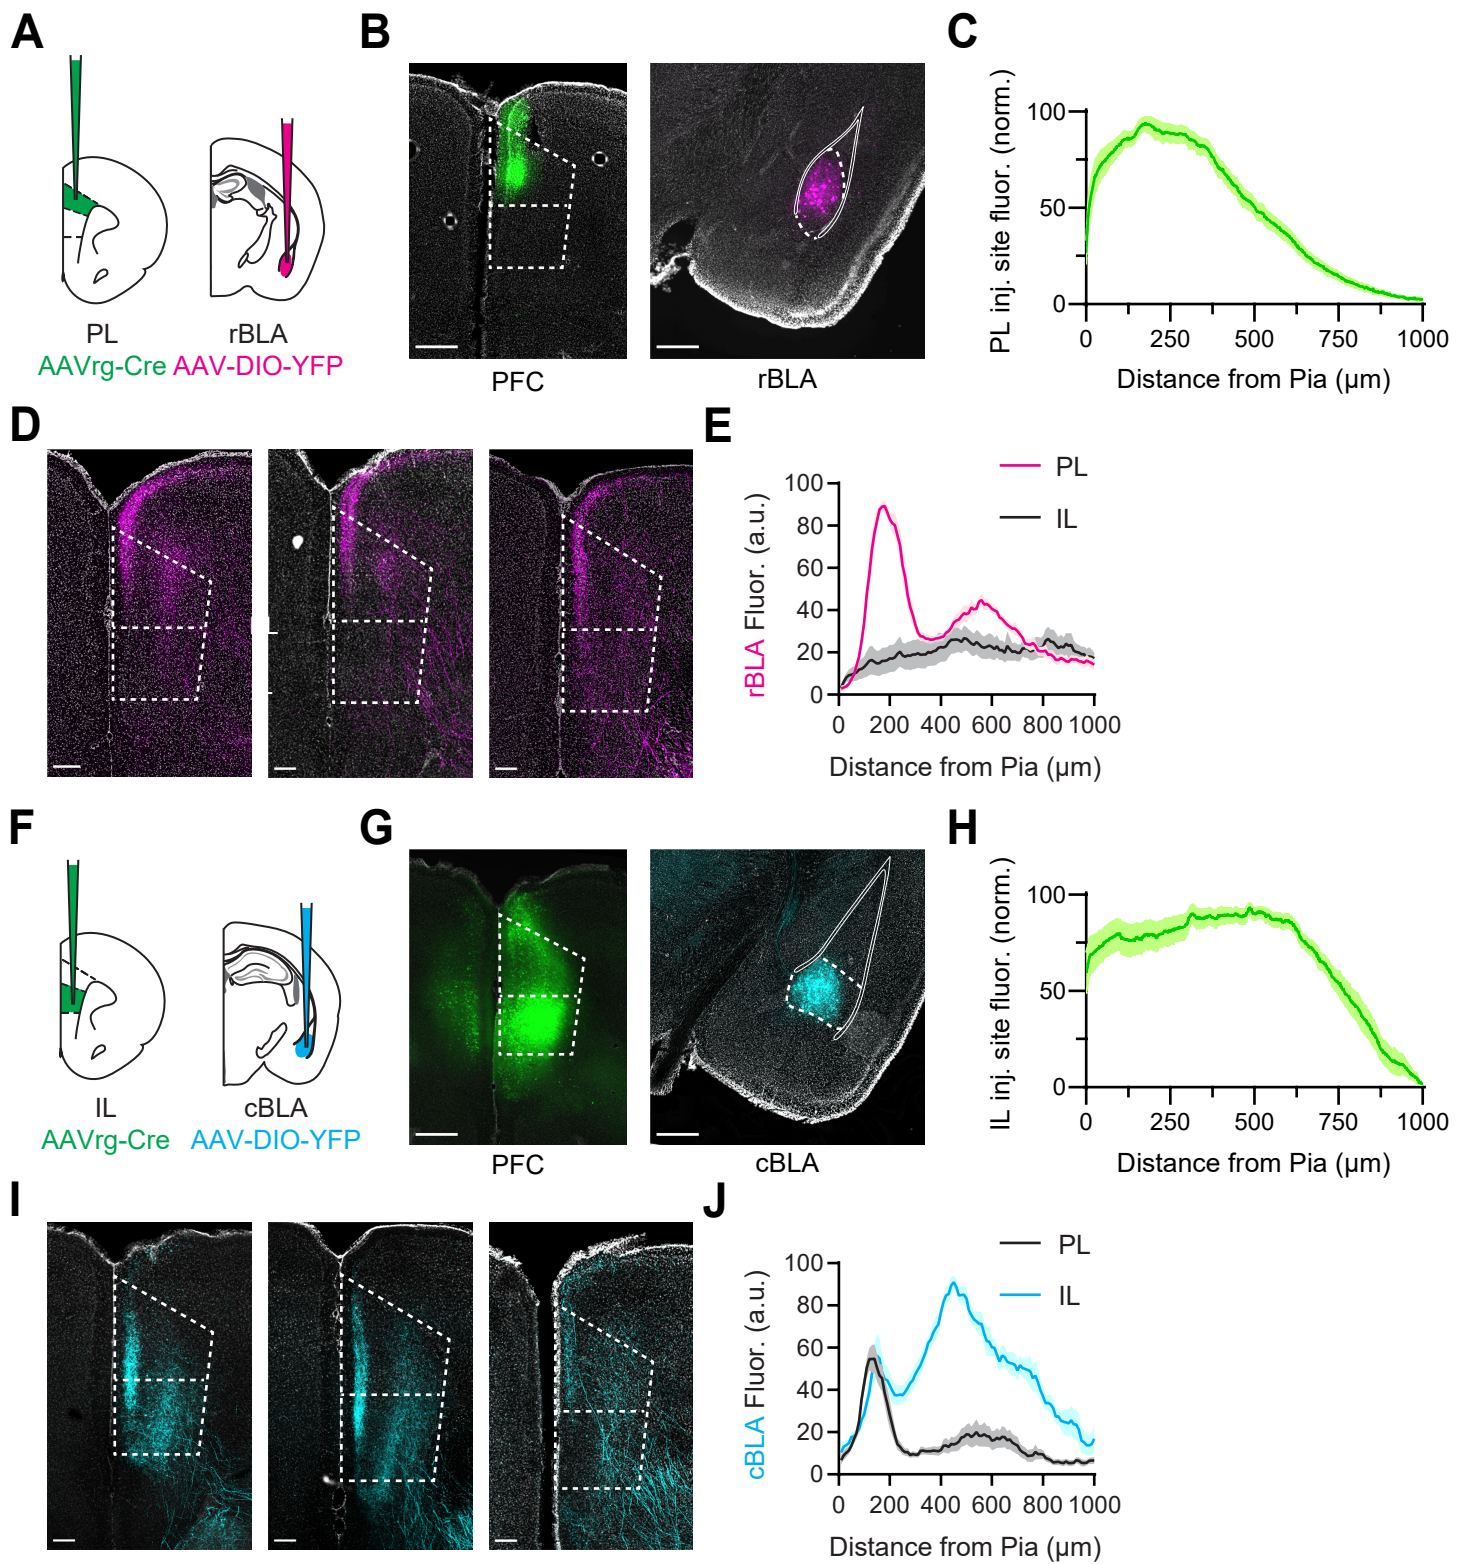

Supplement: supp [file elife-82688-supp-v1.zip]

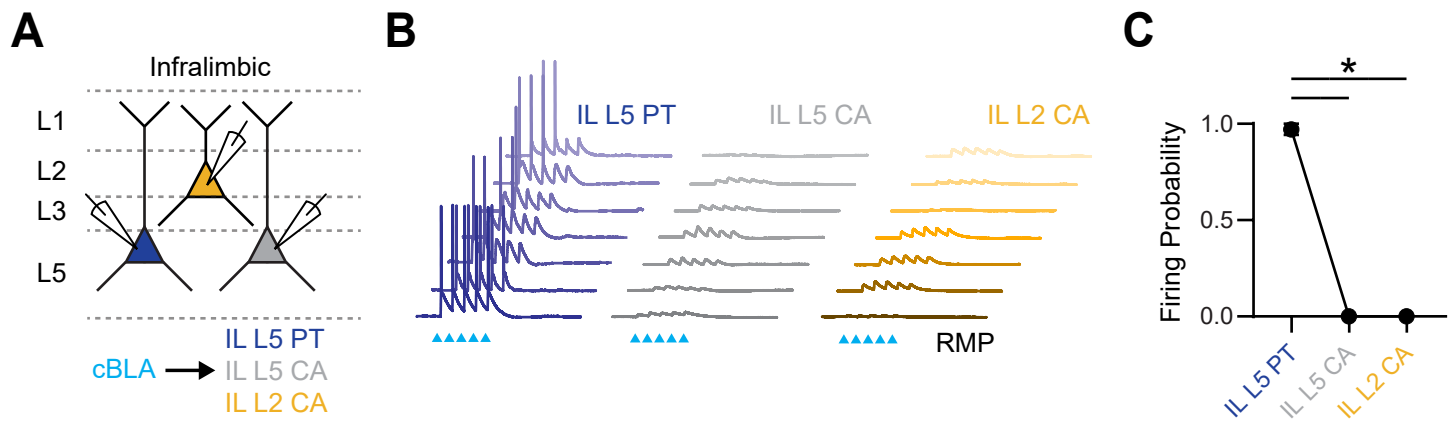

Supplement: supp [file elife-82688-supp-v1.zip]

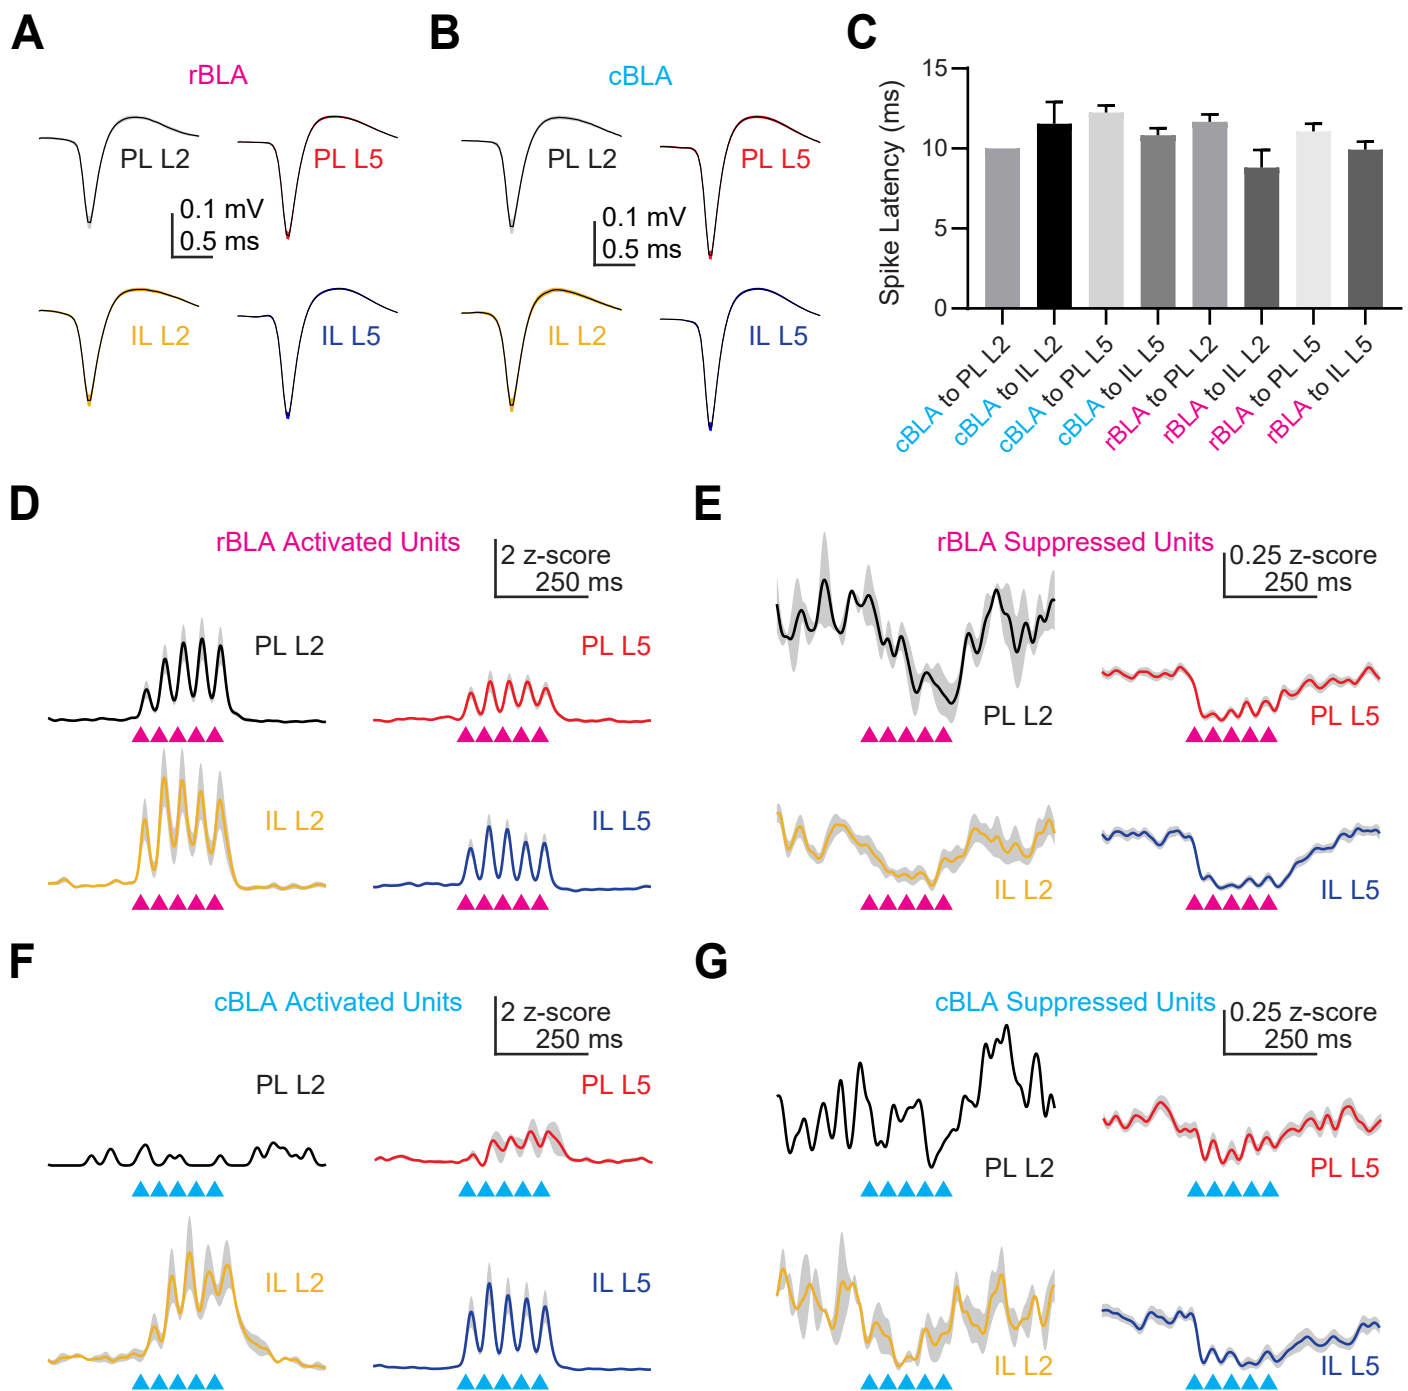

Supplement: supp [file elife-82688-supp-v1.zip]

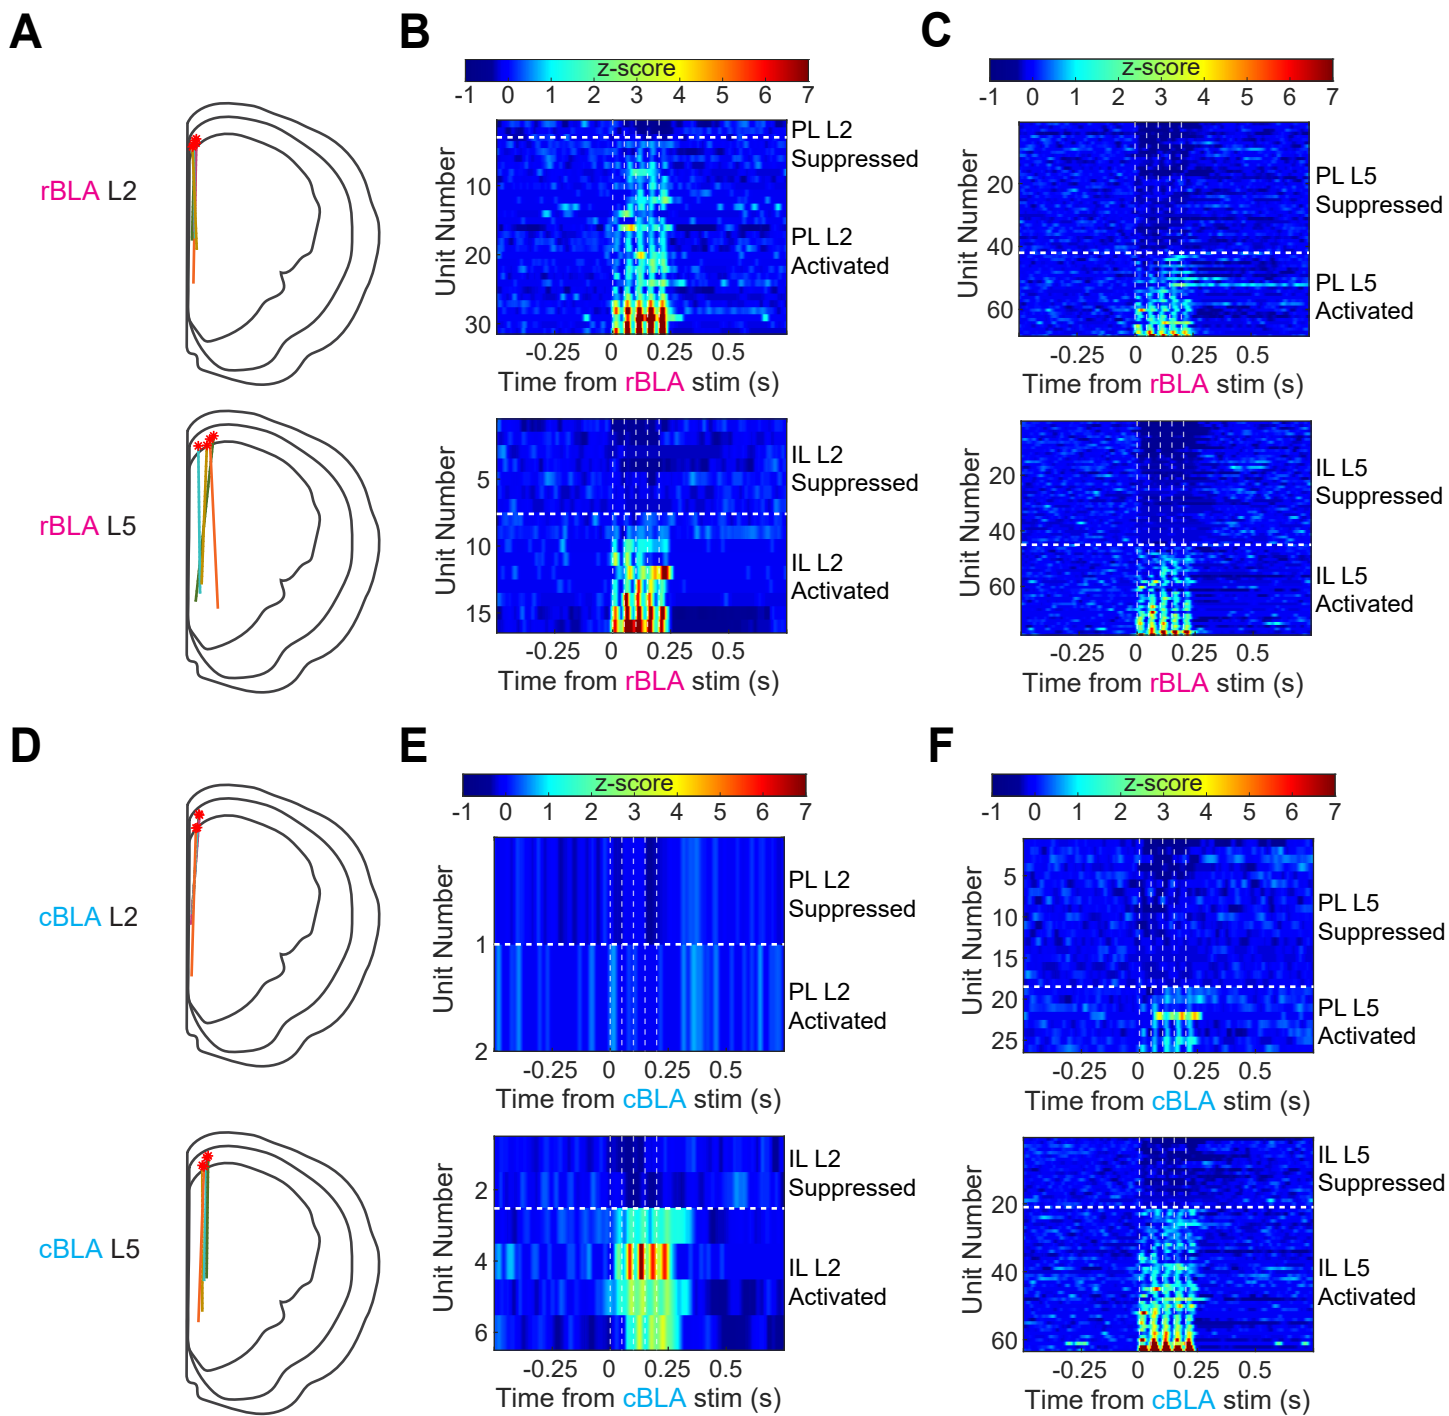

Supplement: supp [file elife-82688-supp-v1.zip]

**A**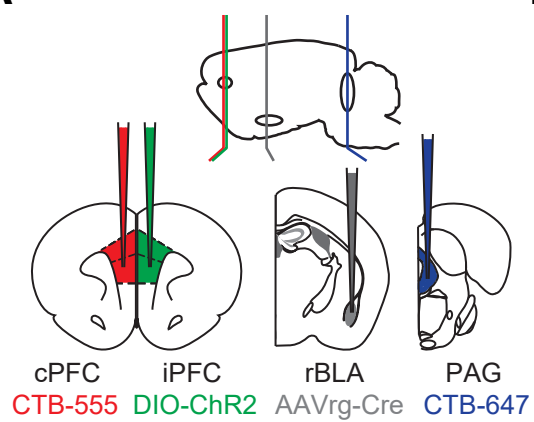**B**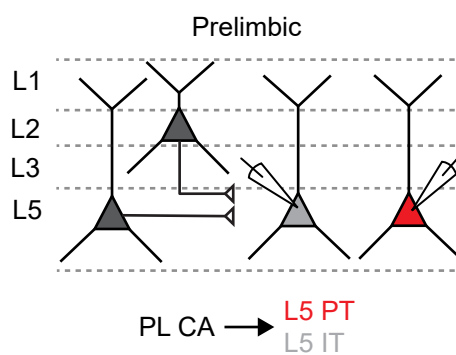**C**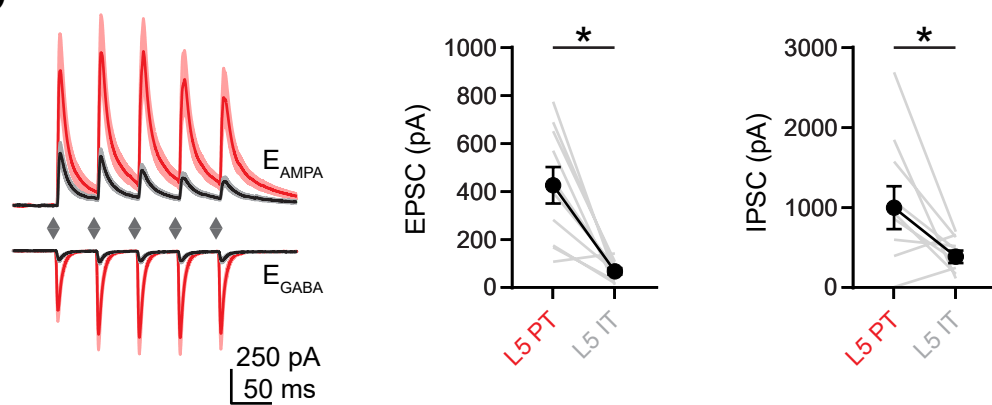

Supplement: supp [file elife-82688-supp-v1.zip]

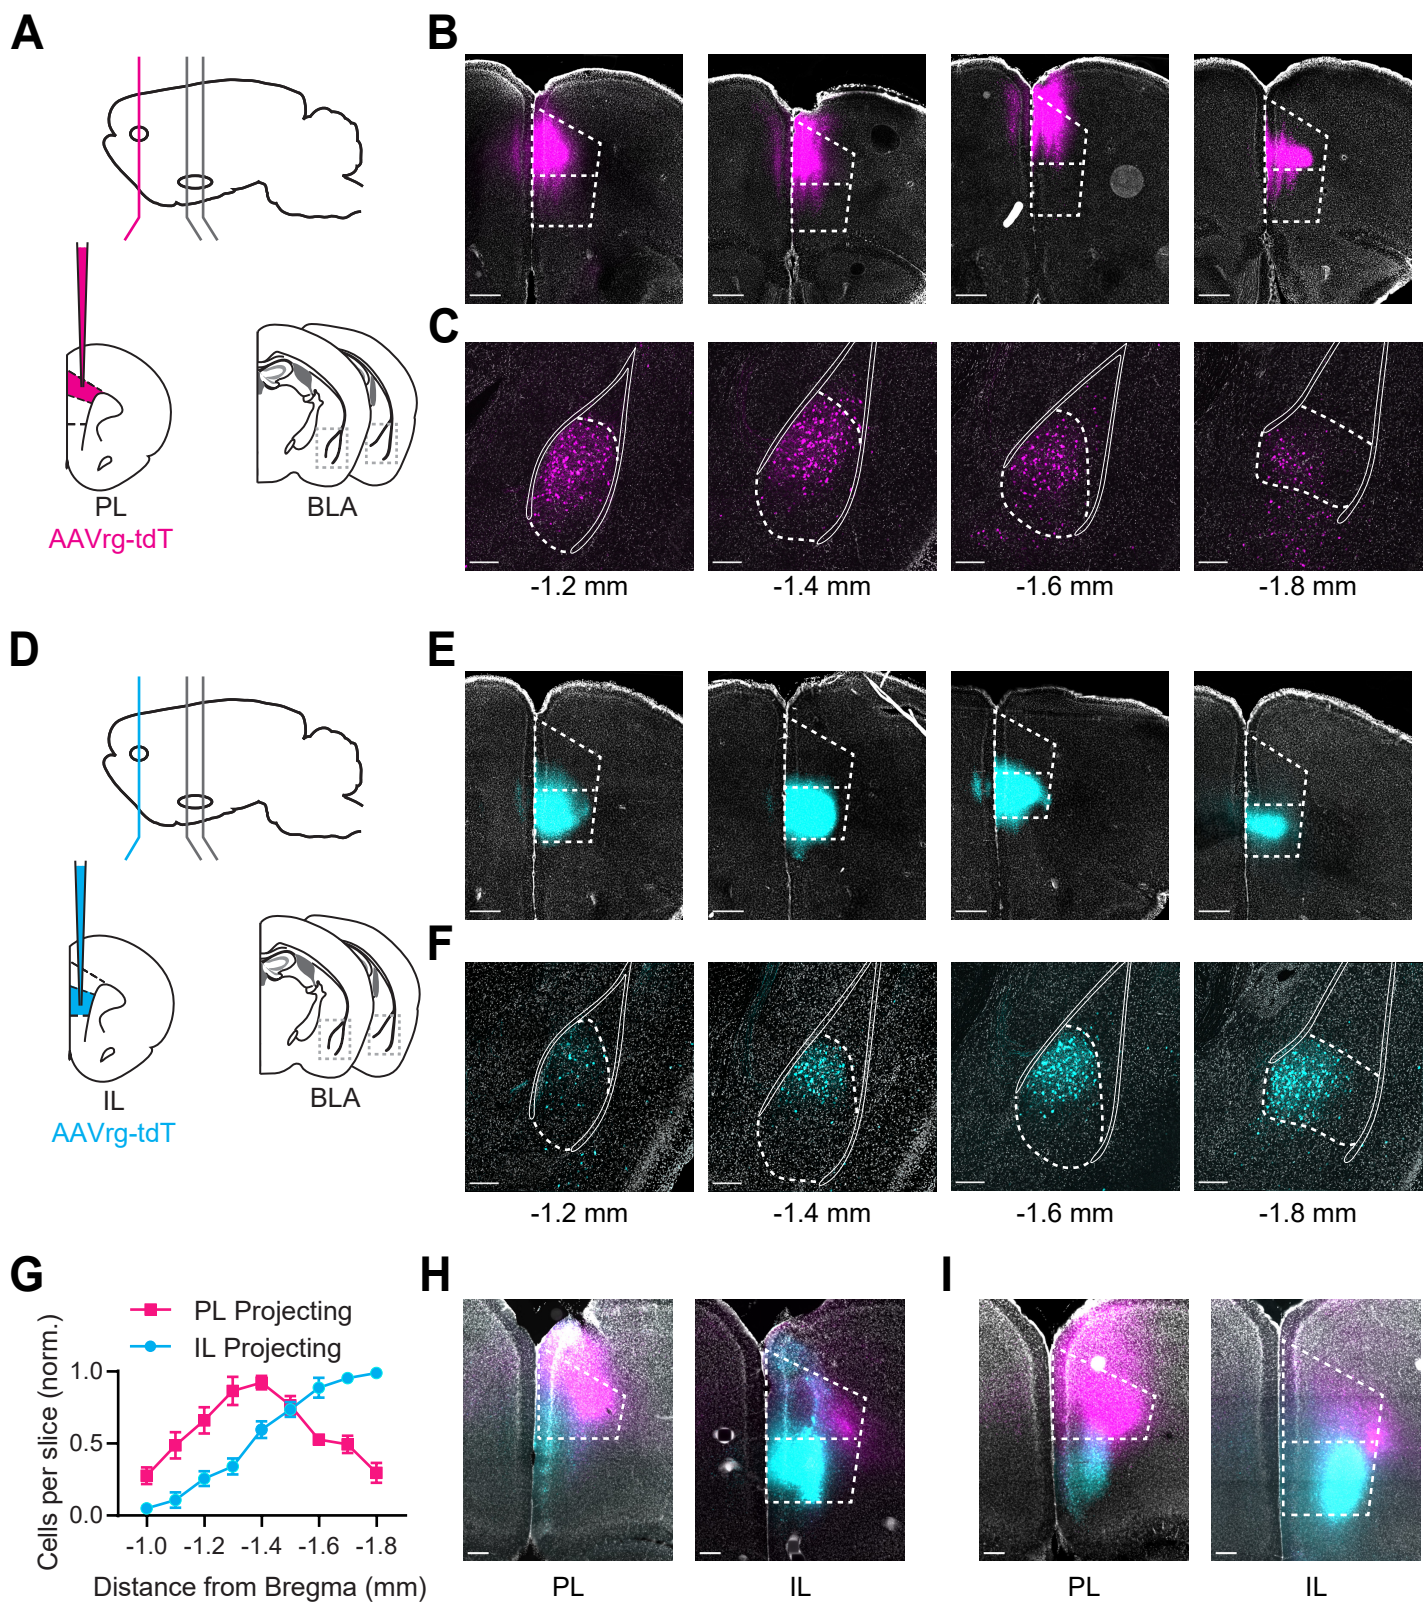

Supplement: supp [file elife-82688-supp-v1.zip]

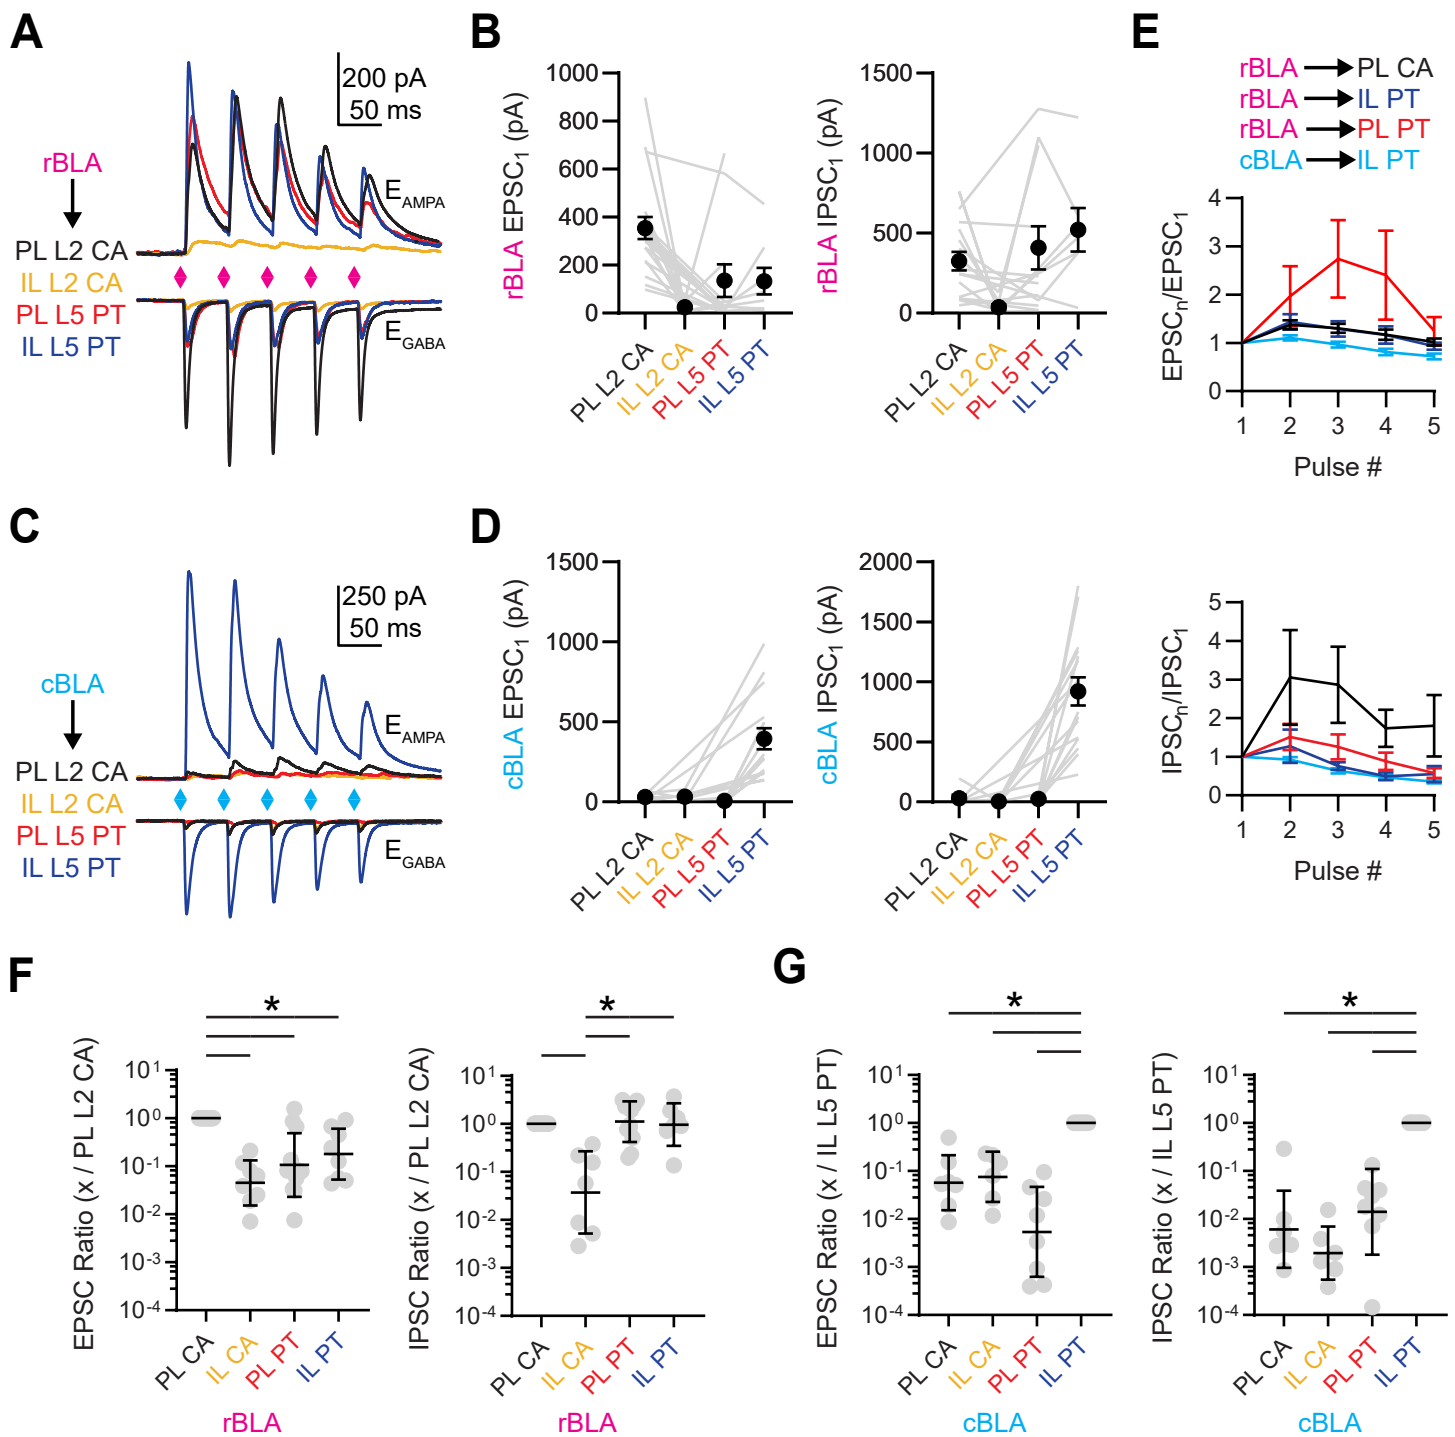

Supplement: supp [file elife-82688-supp-v1.zip]

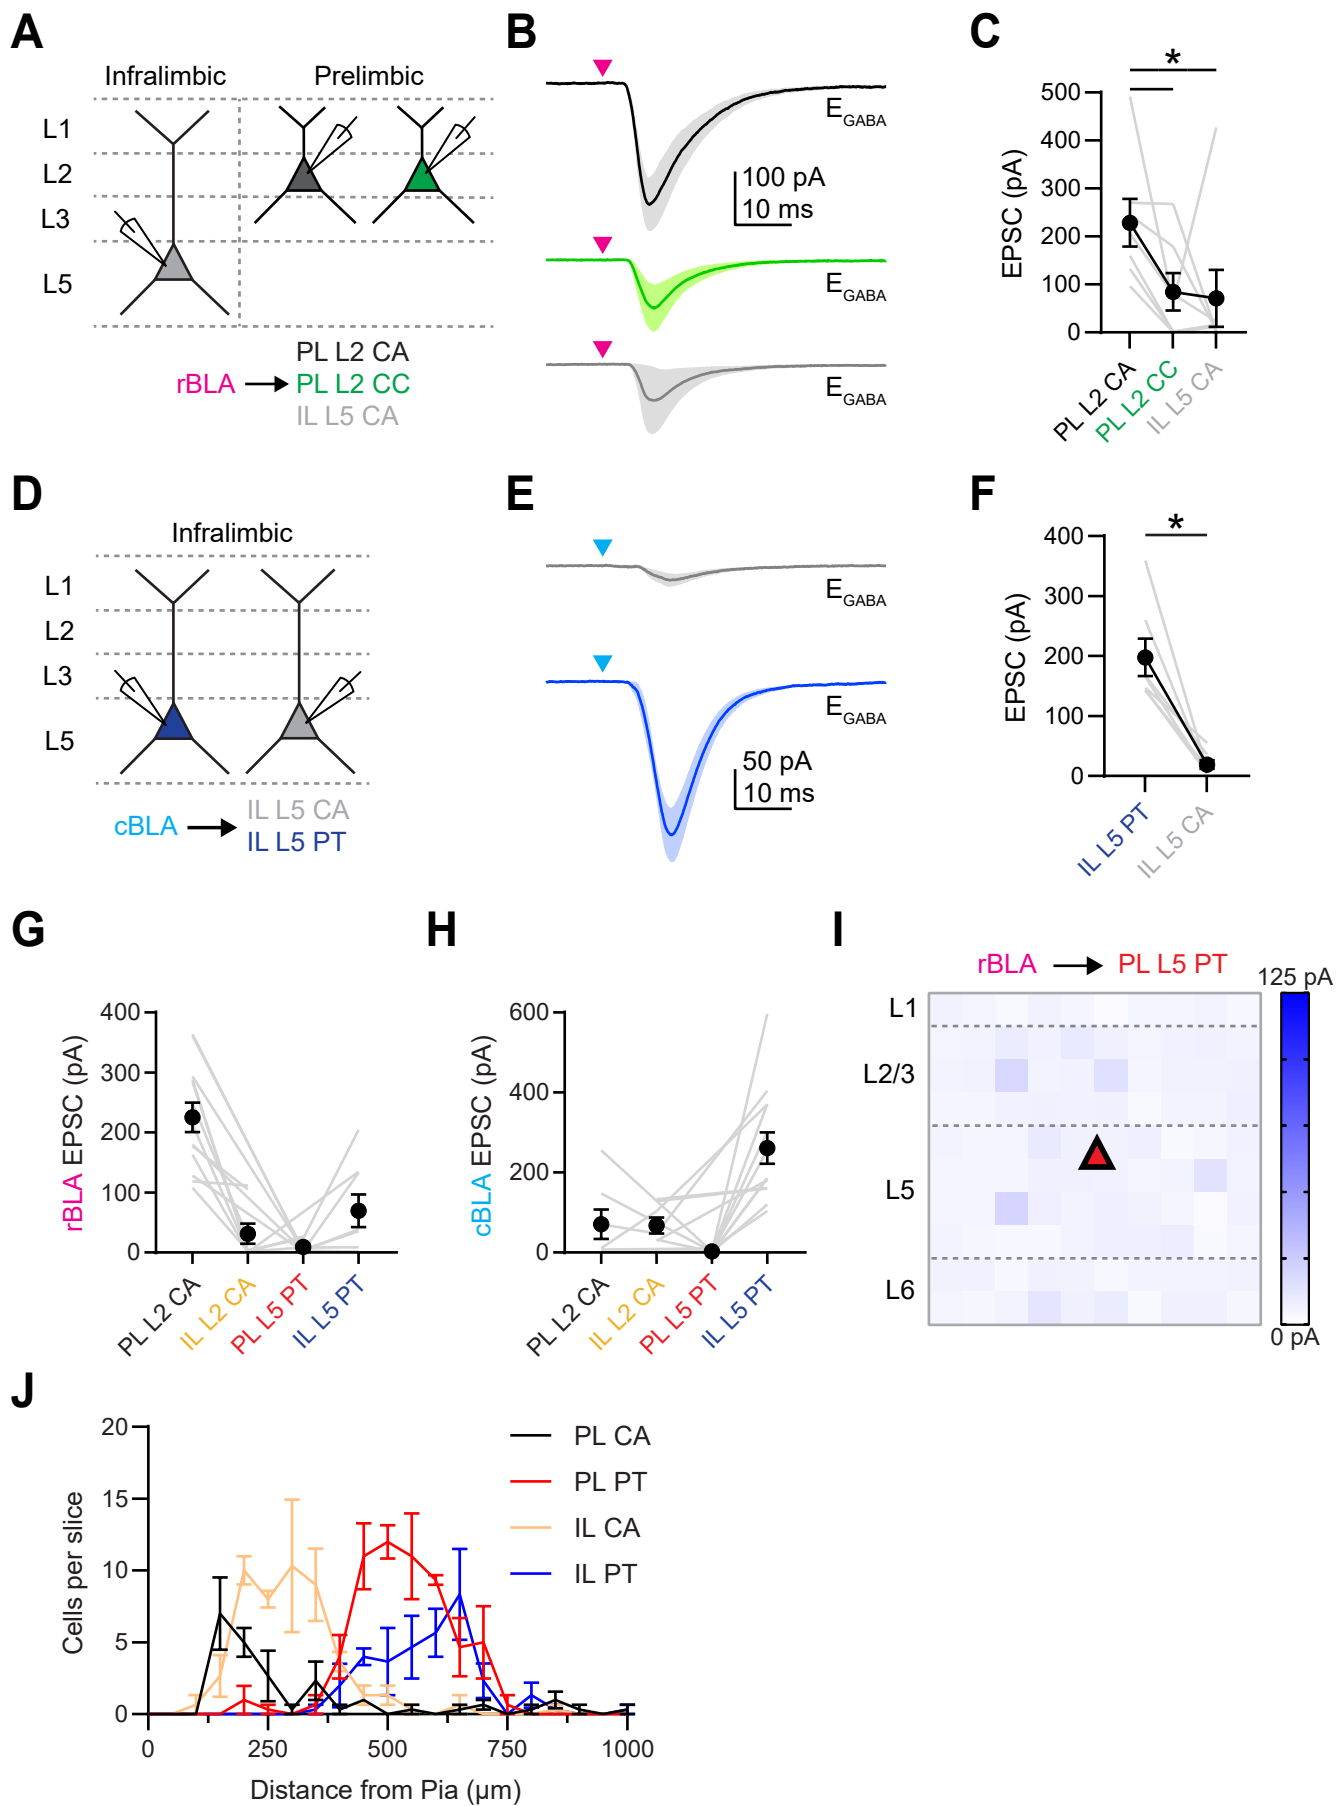

Manoocheri and Carter, Figure 2 - Supplement 1

Supplement: supp [file elife-82688-supp-v1.zip]
